# Supplementary material
Source: PubMed Central journal article supplement (PMC6580366)

## Supporting Information

### **A Selective and Brain Penetrant p38 $\alpha$ MAPK Inhibitor Candidate for Neurologic and Neuropsychiatric Disorders That Attenuates Neuroinflammation and Cognitive Dysfunction**

*Saktimayee M. Roy,<sup>1</sup> George Minasov,<sup>1</sup> Ottavio Arancio,<sup>2</sup> Laura W. Chico,<sup>1</sup> Linda J. Van Eldik,<sup>3</sup> Wayne F. Anderson,<sup>1</sup> Jeffrey C. Pelletier<sup>1</sup> and D. Martin Watterson<sup>1</sup>*

<sup>1</sup>Northwestern University, Chicago, IL 60611, USA; <sup>2</sup>Columbia University, New York, NY 10032, USA, and <sup>3</sup>University of Kentucky, Lexington, KY 40536, USA

#### **Table of Contents**

|                 |           |
|-----------------|-----------|
| <b>Table 1S</b> | <b>S2</b> |
| <b>Table 2S</b> | <b>S3</b> |
| <b>Table 3S</b> | <b>S4</b> |
| <b>Table 4S</b> | <b>S5</b> |
| <b>Table 5S</b> | <b>S6</b> |
| <b>Table 6S</b> | <b>S7</b> |
| <b>Table 7S</b> | <b>S8</b> |
| <b>Table 8S</b> | <b>S9</b> |

| Table 1S. Summary of Prior and Active Clinical Trials. |              |                                      |                      |                                                                                                           |                                                                                                                                                            |
|--------------------------------------------------------|--------------|--------------------------------------|----------------------|-----------------------------------------------------------------------------------------------------------|------------------------------------------------------------------------------------------------------------------------------------------------------------|
| Drug name                                              | CAS#         | Current status*                      | Most Advanced Phase* | Indications                                                                                               | Clinical Trial*                                                                                                                                            |
| ARRY-797 (ARRY-371797)                                 | 765914-60-1  | Recruiting                           | Phase 3              | dilated cardiomyopathy, rheumatoid arthritis, osteoarthritis, ankylosing spondylitis, dental pain         | NCT00542035, NCT00663767, NCT00811499, NCT00729209, NCT02057341, NCT02351856, NCT01366014, NCT00790049, NCT03439514                                        |
| Neflamapomid (VX-745)                                  | 209410-46-8  | Recruiting                           | Phase 2b             | Alzheimer's disease, rheumatoid arthritis                                                                 | NCT02423200, NCT02423122, NCT03402659, NCT03435861; Ann Rheum Dis,2014, 871-82                                                                             |
| CHF6297                                                | Unknown      | Recruiting                           | Phase 1/2            | COPD                                                                                                      | NCT02815488                                                                                                                                                |
| Ralimetinib (LY2228820)                                | 862507-23-1  | Active, Not Recruiting               | Phase 2              | metastatic breast cancer, glioblastoma, recurrent ovarian cancer                                          | NCT02364206, NCT01663857, NCT01393990, NCT02322853, NCT02860780                                                                                            |
| VX-702                                                 | 479543-46-9  | All studies completed                | Phase 2              | Rheumatoid arthritis                                                                                      | NCT00395577, NCT00205478                                                                                                                                   |
| PH-797804                                              | 586379-66-0  | All studies completed                | Phase 2              | COPD, post-herpetic neuralgia, rheumatoid arthritis, osteoarthritis                                       | NCT00559910, NCT01862887, NCT00383188, NCT00620685, NCT00614705, NCT01102660, NCT01226693, NCT01217918, NCT01321463, NCT01543919, NCT02084485, NCT01314885 |
| Losmapimod (GW856553)                                  | 585543-15-3  | All studies completed or terminated  | Phase 3              | focal segmental glomerulosclerosis, COPD, acute coronary syndrome, atherosclerosis                        | NCT00976560, NCT00969059, NCT01110057, NCT02145468, NCT02000440, NCT00569062, NCT01756495, NCT00642148, NCT01541852, NCT00910962, NCT01218126, NCT00633022 |
| Dilmapimod (SB-681323)                                 | 444606-18-2  | All studies completed                | Phase 2              | Rheumatoid arthritis, COPD, acute respiratory distress syndrome, coronary heart disease, neuropathic pain | NCT00564746, NCT00996840, NCT00419809, NCT00390845, NCT00439881, NCT00144859, NCT00291902, NCT00380133, NCT00134693, NCT00320450                           |
| Pexmetinib (ARRY-614)                                  | 945614-12-0  | All studies completed                | Phase 1              | myelodysplastic syndrome                                                                                  | NCT01496495, NCT00916227                                                                                                                                   |
| Pamapimod (RO4402257)                                  | 449811-01-2  | All studies completed                | Phase 2              | rheumatoid arthritis                                                                                      | NCT00303563, NCT00316771                                                                                                                                   |
| Doramapimod (BIRB-796)                                 | 285983-48-4  | All studies completed or terminated  | Phase 2              | psoriasis, Crohn's disease, rheumatoid arthritis                                                          | NCT02209753, NCT02209779, NCT02211170, NCT02214888, NCT02209792, NCT02211885, NCT02209805, NCT02211144, NCT02211157, NCT02209831, NCT02208856              |
| LY-3007113                                             | Unknown      | All studies completed                | Phase 1              | advanced cancer                                                                                           | NCT01463631                                                                                                                                                |
| Talmapimod (SCIO-469)                                  | 309913-83-5  | All studies completed                | Phase 2              | multiple myeloma, myelodysplastic syndrome, rheumatoid arthritis                                          | NCT00113893, NCT00095680, NCT00087867, NCT00043732, NCT00089921, NCT00508768                                                                               |
| BMS-582949                                             | 623152-17-0  | All studies completed                | Phase 2              | rheumatoid arthritis, psoriasis, atherosclerosis                                                          | NCT00507052, NCT00605735, NCT00162292, NCT00399906                                                                                                         |
| PF-03715455 (PF-3715455)                               | 1056164-52-3 | All studies completed or terminated  | Phase 2              | COPD, asthma                                                                                              | NCT02366637, NCT02219048, NCT01186757, NCT01314885                                                                                                         |
| AZD7624                                                | 1095004-87-6 | All studies completed or recruiting  | Phase 2              | COPD, asthma                                                                                              | NCT02753764, NCT02238483, NCT01817855, NCT01754844, NCT01937338                                                                                            |
| TAK-715                                                | 303162-79-0  | Completed                            | Phase 2              | rheumatoid arthritis                                                                                      | NCT00760864                                                                                                                                                |
| Regorafenib (BAY 73-4506)                              | 755037-03-7  | Active, not recruiting or recruiting | Phase 2              | Metastatic Colorectal Cancer, Urothelial Carcinoma                                                        | NCT01949194, NCT02795156                                                                                                                                   |
| Sorafenib (BAY 43-9006)                                | 284461-73-0  | All studies completed or unknown     | Phase 2              | Solid Tumors, Non-Small Cell Lung Cancer, breast cancer                                                   | NCT00095459, NCT00098254, NCT00954135                                                                                                                      |
| RV568                                                  | Unknown      | Study complete                       | Phase 2              | COPD                                                                                                      | NCT01475292                                                                                                                                                |

\*Table summarizes p38 MAPK small molecule inhibitors that have been evaluated in clinical trials. Data points were identified via two primary search methodologies. First, clinicaltrials.gov (accessed November 2018) was searched using the keywords p38 AND P38 under "the other terms" field. Second, the PubMed database (accessed November 2018) was also searched using the term "p38 MAPK inhibitor", filtering results to Article Type as "clinical trial". In both instances, all results were manually inspected for inclusion in the final summary table.

Table 2S: Accession Numbers for Protein Kinases in Kinome Wide Screens

| Kinase      | Accession # | Kinase | Accession # | Kinase  | Accession #  | Kinase | Accession #          | Kinase | Accession #   |
|-------------|-------------|--------|-------------|---------|--------------|--------|----------------------|--------|---------------|
| AAK1        | NM_014811.2 | CHK1   | AY02950.1   | MEK2    | NM_030682.2  | PKC1   | O15330               | PKA    | O15264        |
| Abi         | U07663      | CHK2   | L03840      | MARCK1  | AF154845     | PKH1   | NM_08213.2           | SBK1   | NP_00105672.1 |
| Abi1(H38P)  | U07663      | CHK2   | NP_009125   | MARCK2  | NM_002767.6  | PKH2   | NM_002934            | SKK1   | AF153699      |
| Abi1(M55T)  | U07663      | CHK2   | NP_009125   | MARCK3  | NM_0019867.1 | PKH3   | NM_006193(XM_043865) | SKK2   | NM_016276     |
| Abi2        | U07663      | CHK2   | NP_009125   | MARCK4  | NM_006690.3  | PKH4   | AF154845             | SKK3   | NM_012357     |
| Abi3        | U07663      | CHK2   | NP_009125   | MARCK5  | NM_002401.3  | PKH5   | NM_05028(XM_043865)  | SKK4   | NM_173354     |
| Abi3(Q252H) | U07663      | CHK2   | NP_009125   | MARCK6  | NM_014791    | PKH6   | U79143(XM_043865)    | SKK5   | NM_015191.1   |
| Abi3(L35I)  | U07663      | CHK2   | NP_009125   | MARCK7  | NM_006343    | PKH7   | U79143(XM_043865)    | SKK6   | BC128510.1    |
| Abi3(Y25F)  | U07663      | CHK2   | NP_009125   | MARCK8  | NM_006343    | PKH8   | U79143(XM_043865)    | SKK7   | BC111655.1    |
| ACK1        | NM_005791   | CK1A   | NM_023046   | MARCK9  | U09363       | PKH9   | U79143(XM_043865)    | SKK8   | BC111655.1    |
| ACTR2       | NM_001616.2 | CK1B   | NM_001319   | MARCK10 | U09363       | PKH10  | U79143(XM_043865)    | SKK9   | NM_006622     |
| AKT1        | U02540      | CK1C   | BC0241      | MARCK11 | U09363       | PKH11  | U79143(XM_043865)    | SKK10  | NM_017719     |
| AKT2        | U02540      | CK1D   | BC0241      | MARCK12 | U09363       | PKH12  | U79143(XM_043865)    | SKK11  | NM_017719     |
| AKT3        | U02540      | CK1E   | BC0241      | MARCK13 | U09363       | PKH13  | U79143(XM_043865)    | SKK12  | NM_017719     |
| AKT4        | U02540      | CK1F   | BC0241      | MARCK14 | U09363       | PKH14  | U79143(XM_043865)    | SKK13  | NM_017719     |
| AKT5        | U02540      | CK1G   | BC0241      | MARCK15 | U09363       | PKH15  | U79143(XM_043865)    | SKK14  | NM_017719     |
| AKT6        | U02540      | CK1H   | BC0241      | MARCK16 | U09363       | PKH16  | U79143(XM_043865)    | SKK15  | NM_017719     |
| AKT7        | U02540      | CK1I   | BC0241      | MARCK17 | U09363       | PKH17  | U79143(XM_043865)    | SKK16  | NM_017719     |
| AKT8        | U02540      | CK1J   | BC0241      | MARCK18 | U09363       | PKH18  | U79143(XM_043865)    | SKK17  | NM_017719     |
| AKT9        | U02540      | CK1K   | BC0241      | MARCK19 | U09363       | PKH19  | U79143(XM_043865)    | SKK18  | NM_017719     |
| AKT10       | U02540      | CK1L   | BC0241      | MARCK20 | U09363       | PKH20  | U79143(XM_043865)    | SKK19  | NM_017719     |
| AKT11       | U02540      | CK1M   | BC0241      | MARCK21 | U09363       | PKH21  | U79143(XM_043865)    | SKK20  | NM_017719     |
| AKT12       | U02540      | CK1N   | BC0241      | MARCK22 | U09363       | PKH22  | U79143(XM_043865)    | SKK21  | NM_017719     |
| AKT13       | U02540      | CK1O   | BC0241      | MARCK23 | U09363       | PKH23  | U79143(XM_043865)    | SKK22  | NM_017719     |
| AKT14       | U02540      | CK1P   | BC0241      | MARCK24 | U09363       | PKH24  | U79143(XM_043865)    | SKK23  | NM_017719     |
| AKT15       | U02540      | CK1Q   | BC0241      | MARCK25 | U09363       | PKH25  | U79143(XM_043865)    | SKK24  | NM_017719     |
| AKT16       | U02540      | CK1R   | BC0241      | MARCK26 | U09363       | PKH26  | U79143(XM_043865)    | SKK25  | NM_017719     |
| AKT17       | U02540      | CK1S   | BC0241      | MARCK27 | U09363       | PKH27  | U79143(XM_043865)    | SKK26  | NM_017719     |
| AKT18       | U02540      | CK1T   | BC0241      | MARCK28 | U09363       | PKH28  | U79143(XM_043865)    | SKK27  | NM_017719     |
| AKT19       | U02540      | CK1U   | BC0241      | MARCK29 | U09363       | PKH29  | U79143(XM_043865)    | SKK28  | NM_017719     |
| AKT20       | U02540      | CK1V   | BC0241      | MARCK30 | U09363       | PKH30  | U79143(XM_043865)    | SKK29  | NM_017719     |
| AKT21       | U02540      | CK1W   | BC0241      | MARCK31 | U09363       | PKH31  | U79143(XM_043865)    | SKK30  | NM_017719     |
| AKT22       | U02540      | CK1X   | BC0241      | MARCK32 | U09363       | PKH32  | U79143(XM_043865)    | SKK31  | NM_017719     |
| AKT23       | U02540      | CK1Y   | BC0241      | MARCK33 | U09363       | PKH33  | U79143(XM_043865)    | SKK32  | NM_017719     |
| AKT24       | U02540      | CK1Z   | BC0241      | MARCK34 | U09363       | PKH34  | U79143(XM_043865)    | SKK33  | NM_017719     |
| AKT25       | U02540      | CK2A   | BC0241      | MARCK35 | U09363       | PKH35  | U79143(XM_043865)    | SKK34  | NM_017719     |
| AKT26       | U02540      | CK2B   | BC0241      | MARCK36 | U09363       | PKH36  | U79143(XM_043865)    | SKK35  | NM_017719     |
| AKT27       | U02540      | CK2C   | BC0241      | MARCK37 | U09363       | PKH37  | U79143(XM_043865)    | SKK36  | NM_017719     |
| AKT28       | U02540      | CK2D   | BC0241      | MARCK38 | U09363       | PKH38  | U79143(XM_043865)    | SKK37  | NM_017719     |
| AKT29       | U02540      | CK2E   | BC0241      | MARCK39 | U09363       | PKH39  | U79143(XM_043865)    | SKK38  | NM_017719     |
| AKT30       | U02540      | CK2F   | BC0241      | MARCK40 | U09363       | PKH40  | U79143(XM_043865)    | SKK39  | NM_017719     |
| AKT31       | U02540      | CK2G   | BC0241      | MARCK41 | U09363       | PKH41  | U79143(XM_043865)    | SKK40  | NM_017719     |
| AKT32       | U02540      | CK2H   | BC0241      | MARCK42 | U09363       | PKH42  | U79143(XM_043865)    | SKK41  | NM_017719     |
| AKT33       | U02540      | CK2I   | BC0241      | MARCK43 | U09363       | PKH43  | U79143(XM_043865)    | SKK42  | NM_017719     |
| AKT34       | U02540      | CK2J   | BC0241      | MARCK44 | U09363       | PKH44  | U79143(XM_043865)    | SKK43  | NM_017719     |
| AKT35       | U02540      | CK2K   | BC0241      | MARCK45 | U09363       | PKH45  | U79143(XM_043865)    | SKK44  | NM_017719     |
| AKT36       | U02540      | CK2L   | BC0241      | MARCK46 | U09363       | PKH46  | U79143(XM_043865)    | SKK45  | NM_017719     |
| AKT37       | U02540      | CK2M   | BC0241      | MARCK47 | U09363       | PKH47  | U79143(XM_043865)    | SKK46  | NM_017719     |
| AKT38       | U02540      | CK2N   | BC0241      | MARCK48 | U09363       | PKH48  | U79143(XM_043865)    | SKK47  | NM_017719     |
| AKT39       | U02540      | CK2O   | BC0241      | MARCK49 | U09363       | PKH49  | U79143(XM_043865)    | SKK48  | NM_017719     |
| AKT40       | U02540      | CK2P   | BC0241      | MARCK50 | U09363       | PKH50  | U79143(XM_043865)    | SKK49  | NM_017719     |
| AKT41       | U02540      | CK2Q   | BC0241      | MARCK51 | U09363       | PKH51  | U79143(XM_043865)    | SKK50  | NM_017719     |
| AKT42       | U02540      | CK2R   | BC0241      | MARCK52 | U09363       | PKH52  | U79143(XM_043865)    | SKK51  | NM_017719     |
| AKT43       | U02540      | CK2S   | BC0241      | MARCK53 | U09363       | PKH53  | U79143(XM_043865)    | SKK52  | NM_017719     |
| AKT44       | U02540      | CK2T   | BC0241      | MARCK54 | U09363       | PKH54  | U79143(XM_043865)    | SKK53  | NM_017719     |
| AKT45       | U02540      | CK2U   | BC0241      | MARCK55 | U09363       | PKH55  | U79143(XM_043865)    | SKK54  | NM_017719     |
| AKT46       | U02540      | CK2V   | BC0241      | MARCK56 | U09363       | PKH56  | U79143(XM_043865)    | SKK55  | NM_017719     |
| AKT47       | U02540      | CK2W   | BC0241      | MARCK57 | U09363       | PKH57  | U79143(XM_043865)    | SKK56  | NM_017719     |
| AKT48       | U02540      | CK2X   | BC0241      | MARCK58 | U09363       | PKH58  | U79143(XM_043865)    | SKK57  | NM_017719     |
| AKT49       | U02540      | CK2Y   | BC0241      | MARCK59 | U09363       | PKH59  | U79143(XM_043865)    | SKK58  | NM_017719     |
| AKT50       | U02540      | CK2Z   | BC0241      | MARCK60 | U09363       | PKH60  | U79143(XM_043865)    | SKK59  | NM_017719     |
| AKT51       | U02540      | CK3A   | BC0241      | MARCK61 | U09363       | PKH61  | U79143(XM_043865)    | SKK60  | NM_017719     |
| AKT52       | U02540      | CK3B   | BC0241      | MARCK62 | U09363       | PKH62  | U79143(XM_043865)    | SKK61  | NM_017719     |
| AKT53       | U02540      | CK3C   | BC0241      | MARCK63 | U09363       | PKH63  | U79143(XM_043865)    | SKK62  | NM_017719     |
| AKT54       | U02540      | CK3D   | BC0241      | MARCK64 | U09363       | PKH64  | U79143(XM_043865)    | SKK63  | NM_017719     |
| AKT55       | U02540      | CK3E   | BC0241      | MARCK65 | U09363       | PKH65  | U79143(XM_043865)    | SKK64  | NM_017719     |
| AKT56       | U02540      | CK3F   | BC0241      | MARCK66 | U09363       | PKH66  | U79143(XM_043865)    | SKK65  | NM_017719     |
| AKT57       | U02540      | CK3G   | BC0241      | MARCK67 | U09363       | PKH67  | U79143(XM_043865)    | SKK66  | NM_017719     |
| AKT58       | U02540      | CK3H   | BC0241      | MARCK68 | U09363       | PKH68  | U79143(XM_043865)    | SKK67  | NM_017719     |
| AKT59       | U02540      | CK3I   | BC0241      | MARCK69 | U09363       | PKH69  | U79143(XM_043865)    | SKK68  | NM_017719     |
| AKT60       | U02540      | CK3J   | BC0241      | MARCK70 | U09363       | PKH70  | U79143(XM_043865)    | SKK69  | NM_017719     |
| AKT61       | U02540      | CK3K   | BC0241      | MARCK71 | U09363       | PKH71  | U79143(XM_043865)    | SKK70  | NM_017719     |
| AKT62       | U02540      | CK3L   | BC0241      | MARCK72 | U09363       | PKH72  | U79143(XM_043865)    | SKK71  | NM_017719     |
| AKT63       | U02540      | CK3M   | BC0241      | MARCK73 | U09363       | PKH73  | U79143(XM_043865)    | SKK72  | NM_017719     |
| AKT64       | U02540      | CK3N   | BC0241      | MARCK74 | U09363       | PKH74  | U79143(XM_043865)    | SKK73  | NM_017719     |
| AKT65       | U02540      | CK3O   | BC0241      | MARCK75 | U09363       | PKH75  | U79143(XM_043865)    | SKK74  | NM_017719     |
| AKT66       | U02540      | CK3P   | BC0241      | MARCK76 | U09363       | PKH76  | U79143(XM_043865)    | SKK75  | NM_017719     |
| AKT67       | U02540      | CK3Q   | BC0241      | MARCK77 | U09363       | PKH77  | U79143(XM_043865)    | SKK76  | NM_017719     |
| AKT68       | U02540      | CK3R   | BC0241      | MARCK78 | U09363       | PKH78  | U79143(XM_043865)    | SKK77  | NM_017719     |
| AKT69       | U02540      | CK3S   | BC0241      | MARCK79 | U09363       | PKH79  | U79143(XM_043865)    | SKK78  | NM_017719     |
| AKT70       | U02540      | CK3T   | BC0241      | MARCK80 | U09363       | PKH80  | U79143(XM_043865)    | SKK79  | NM_017719     |
| AKT71       | U02540      | CK3U   | BC0241      | MARCK81 | U09363       | PKH81  | U79143(XM_043865)    | SKK80  | NM_017719     |
| AKT72       | U02540      | CK3V   | BC0241      | MARCK82 | U09363       | PKH82  | U79143(XM_043865)    | SKK81  | NM_017719     |
| AKT73       | U02540      | CK3W   | BC0241      | MARCK83 | U09363       | PKH83  | U79143(XM_043865)    | SKK82  | NM_017719     |
| AKT74       | U02540      | CK3X   | BC0241      | MARCK84 | U09363       | PKH84  | U79143(XM_043865)    | SKK83  | NM_017719     |
| AKT75       | U02540      | CK3Y   | BC0241      | MARCK85 | U09363       | PKH85  | U79143(XM_043865)    | SKK84  | NM_017719     |
| AKT76       | U02540      | CK3Z   | BC0241      | MARCK86 | U09363       | PKH86  | U79143(XM_043865)    | SKK85  | NM_017719     |
| AKT77       | U02540      | CK4A   | BC0241      | MARCK87 | U09363       | PKH87  | U79143(XM_043865)    | SKK86  | NM_017719     |
| AKT78       | U02540      | CK4B   | BC0241      | MARCK88 | U09363       | PKH88  | U79143(XM_043865)    | SKK87  | NM_017719     |
| AKT79       | U02540      | CK4C   | BC0241      | MARCK89 | U09363       | PKH89  | U79143(XM_043865)    | SKK88  | NM_017719     |
| AKT80       | U02540      | CK4D   | BC0241      | MARCK90 | U09363       | PKH90  | U79143(XM_043865)    | SKK89  | NM_017719     |
| AKT81       | U02540      | CK4E   | BC0241      | MARCK91 | U09363       | PKH91  | U79143(XM_043865)    | SKK90  | NM_017719     |
| AKT82       | U02540      | CK4F   | BC0241      | MARCK92 | U09363       | PKH92  | U79143(XM_043865)    | SKK91  | NM_017719     |
| AKT83       | U02540      | CK4G   | BC0241      | MARCK93 | U09363       | PKH93  | U79143(XM_043865)    | SKK92  | NM_017719     |
| AKT84       | U02540      | CK4H   | BC0241      | MARCK94 | U09363       | PKH94  | U79143(XM_043865)    | SKK93  | NM_017719     |
| AKT85       | U02540      | CK4I   | BC0241      | MARCK95 | U09363       | PKH95  | U79143(XM_043865)    | SKK94  | NM_017719     |
| AKT86       | U02540      | CK4J   | BC0241      | MARCK96 | U            |        |                      |        |               |

**Table 3S. Kinome Wide Screen of MW01-6-189WH**

|                   | H | Kinase        | H | Kinase        | H | Kinase       | H | Kinase                     | H | Kinase         | H | Kinase       | H | Kinase            | H | Kinase                     | H |
|-------------------|---|---------------|---|---------------|---|--------------|---|----------------------------|---|----------------|---|--------------|---|-------------------|---|----------------------------|---|
| AAK1              | - | CDK14/cyclinY | - | EphA5         | - | JNK1α1       | - | MYLK2                      | - | PKCe           | - | STK33        | - | PKCe              | - | STK33                      | - |
| Abi               | - | CDK16/cyclinY | - | EphA7         | - | JNK2α2       | - | MYO3B                      | - | PKCη           | - | STK39        | - | PKCη              | - | STK39                      | - |
| Abi (H396P)       | - | CDK17/cyclinY | - | EphA8         | - | JNK3         | - | NDRI                       | - | PKCι           | - | Syk          | - | PKCι              | - | Syk                        | - |
| Abi (M351T)       | - | CDK18/cyclinY | - | EphB2         | - | KDR          | - | NDR2                       | - | PKCμ           | - | TAFIL        | - | PKCμ              | - | TAFIL                      | - |
| Abi (Q252H)       | - | CDK11         | - | EphB1         | - | LATS1        | - | NEK1                       | - | PKCθ           | - | TAK1         | - | PKCθ              | - | TAK1                       | - |
| Abi (T315I)       | - | CDK12         | - | EphB3         | - | LATS2        | - | NEK2                       | - | PKCε           | - | TAO1         | - | PKCε              | - | TAO1                       | - |
| Abi (Y253F)       | - | CDK13         | - | EphB4         | - | Lck          | - | NEK4                       | - | PKD2           | - | TAO2         | - | PKD2              | - | TAO2                       | - |
| ACK1              | - | CDK14         | - | ErbB2         | - | Lck act.     | - | NEK3                       | - | PKD3           | - | TAO3         | - | PKD3              | - | TAO3                       | - |
| ACTR2             | - | ChaK1         | - | ErbB4         | - | LIMK1        | - | NEK6                       | - | PKG1α          | - | TBK1         | - | PKG1α             | - | TBK1                       | - |
| ALK               | - | CHK1          | - | FAK           | - | LIMK2        | - | NEK7                       | - | PKG1β          | - | Tec act.     | - | PKG1β             | - | Tec act.                   | - |
| ALK1              | - | CHK2          | - | Fer           | - | LKB1         | - | NEK9                       | - | PKR            | - | TGFBRI       | - | PKR               | - | TGFBRI                     | - |
| ALK2              | - | CHK2 (I157T)  | - | Fes           | - | LOK          | - | NIM1                       | - | Plk1           | - | TGFBR2       | - | Plk1              | - | TGFBR2                     | - |
| ALK4              | - | CHK2 (R145W)  | - | FGFR1         | - | Lyn          | - | NEK11                      | - | Plk3           | - | Tie2         | - | Plk3              | - | Tie2                       | - |
| ALK6              | - | CK1α          | - | FGFR1 (V561M) | - | LRRK2        | - | NLK                        | - | Plk4           | - | Tie2 (R849W) | - | Plk4              | - | Tie2 (R849W)               | - |
| Arg               | - | CK1ε          | - | FGFR2         | - | LTK          | - | NUAK2                      | - | PRAK           | - | Tie2 (Y897S) | - | PRAK              | - | Tie2 (Y897S)               | - |
| AMPKα1            | - | CK1γ1         | - | FGFR2 (N549H) | - | MAK          | - | OSR1                       | - | PRKG2          | - | TLK1         | - | PRKG2             | - | TLK1                       | - |
| AMPKα2            | - | CK1γ2         | - | FGFR3         | - | MAPK1        | - | p70S6K                     | - | PRK1           | - | TLK2         | - | PRK1              | - | TLK2                       | - |
| A-Raf             | - | CK1γ3         | - | FGFR4         | - | MAPK2        | - | PAK1                       | - | PRK2           | - | TNIK         | - | PRK2              | - | TNIK                       | - |
| ARK5              | - | CK1δ          | - | Fgr           | - | MAP4K3       | - | PAK2                       | - | PRKX           | - | TRB2         | - | PRKX              | - | TRB2                       | - |
| ASK1              | - | CK2           | - | Fhl1          | - | MAP4K4       | - | PAK3                       | - | PRP4           | - | TrkA         | - | PRP4              | - | TrkA                       | - |
| ATM               | - | CK2α1         | - | Fil3 (D835Y)  | - | MAP4K5       | - | PAK4                       | - | PTK5           | - | TrkB         | - | PTK5              | - | TrkB                       | - |
| ATR/A/TRIP        | - | CK2α2         | - | Fil3          | - | MAPKAP-K2    | - | PAK5                       | - | Pyk2           | - | TrkC         | - | Pyk2              | - | TrkC                       | - |
| Aurora-A          | - | CLK1          | - | Fil4          | - | MAPKAP-K3    | - | PAK6                       | - | Ret            | - | TSSK1        | - | Ret               | - | TSSK1                      | - |
| Aurora-B          | - | CLK2          | - | Fms           | - | MEK1         | - | PAR-1Bα                    | - | Ret (V804L)    | - | TSSK2        | - | Ret (V804L)       | - | TSSK2                      | - |
| Aurora-C          | - | CLK1          | - | Fms (Y969C)   | - | MEK2         | - | PASK                       | - | Ret (V804M)    | - | TSSK3        | - | Ret (V804M)       | - | TSSK3                      | - |
| Axl               | - | CLK2          | - | Fyn           | - | MARK1        | - | PEK                        | - | RIPK1          | - | TSSK4        | - | RIPK1             | - | TSSK4                      | - |
| Bik               | - | CLK4          | - | Gck           | - | MARK3        | - | PDGFRα                     | - | RIPK2          | - | TTBK1        | - | RIPK2             | - | TTBK1                      | - |
| Blk               | - | eKit          | - | GCN2          | - | MARK4        | - | PDGFRα (D842V)             | - | ROCK-1         | - | TTBK2        | - | PDGFRα (D842V)    | - | TTBK2                      | - |
| BMPR2             | - | eKit (D816V)  | - | GRK1          | - | MEK2         | - | PDGFRα (V561D)             | - | ROCK-II        | - | TTK          | - | PDGFRα (V561D)    | - | TTK                        | - |
| Bmx               | - | eKit (D816H)  | - | GRK2          | - | MEK3         | - | PDGFRβ                     | - | Ron            | - | Tyk2         | - | PDGFRβ            | - | Tyk2                       | - |
| BRK               | - | eKit (V560G)  | - | GRK3          | - | MELK         | - | PDHK2                      | - | Ros            | - | Tyk2         | - | PDHK2             | - | Ros                        | - |
| BRSK1             | - | eKit (V654A)  | - | GRK5          | - | Mer          | - | PDHK4                      | - | Rse            | - | ULK1         | - | PDHK4             | - | Rse                        | - |
| BRSK2             | - | CRIK          | - | GRK6          | - | Met          | - | PDK1                       | - | Rsk1           | - | ULK2         | - | PDK1              | - | Rsk1                       | - |
| BTk               | - | CSK           | - | GRK7          | - | Met (D1246H) | - | PhKγ1                      | - | Rsk2           | - | ULK3         | - | PhKγ1             | - | Rsk2                       | - |
| BTk (R28H)        | - | e-RAF         | - | GSK3α         | - | Met (D1246N) | - | PhKγ2                      | - | Rsk3           | - | VRK1         | - | e-RAF             | - | Rsk3                       | - |
| B-Raf             | - | GSK3β         | - | GSK3β         | - | Met (M1268T) | - | P13K (p110β/p85α)          | - | Rsk4           | - | VRK2         | - | GSK3β             | - | P13K (p110β/p85α)          | - |
| B-Raf (V599E)     | - | DAPK1         | - | Haespin       | - | Met (Y1248C) | - | P13K (p120γ)               | - | SAPK2α         | - | Wee1         | - | DAPK1             | - | P13K (p120γ)               | - |
| CaMK1             | - | DAPK2         | - | Hck           | - | Met (Y1248D) | - | P13K (p110δ/p85α)          | - | SAPK2α (T106M) | - | Wee1B        | - | DAPK2             | - | P13K (p110δ/p85α)          | - |
| CaMK1B            | - | DCAMKL1       | - | Hck act.      | - | MINK         | - | P13K (p110α (E542K)/p85α)  | - | SAPK2β         | - | Wnk1         | - | CaMK1B            | - | P13K (p110α (E542K)/p85α)  | - |
| CaMK1γ            | - | DCAMKL2       | - | HIPK1         | - | MINK         | - | P13K (p110α (H1047K)/p85α) | - | SAPK3          | - | Wnk2         | - | CaMK1γ            | - | P13K (p110α (H1047K)/p85α) | - |
| CaMK1δ            | - | DCAMKL3       | - | HIPK2         | - | MKK3         | - | MLCK                       | - | SAPK4          | - | Wnk3         | - | CaMK1δ            | - | P13K (p110α (E545K)/p85α)  | - |
| CaMK1β            | - | DDR1          | - | HIPK3         | - | MLCK         | - | MLCK                       | - | SBK1           | - | Wnk4         | - | CaMK1β            | - | P13K (p110α/p65α)          | - |
| CaMK1γ            | - | DDR2          | - | HIPK4         | - | MLK1         | - | MLK1                       | - | SGK            | - | Yes          | - | CaMK1γ            | - | P13K (p110α/p65α)          | - |
| CaMK1δ            | - | DMPK          | - | HIPK1         | - | MLK2         | - | MLK2                       | - | SGK2           | - | ZAK          | - | CaMK1δ            | - | P13K C2γ                   | - |
| CaMK1θ            | - | DNA-PK        | - | HRI           | - | MLK3         | - | MLK3                       | - | SGK3           | - | ZAP-70       | - | CaMK1θ            | - | P13K C2α                   | - |
| CaMKIV            | - | DRAK1         | - | ICK           | - | MLK4         | - | MLK4                       | - | SIK            | - | ZIPK         | - | CaMKIV            | - | PIP4K2α                    | - |
| CaMKK1            | - | DRAK2         | - | IGF-1R        | - | Mnk2         | - | Mnk2                       | - | SIK2           | - | -            | - | CaMKK1            | - | PIP5K1α                    | - |
| CaMKK2            | - | DYRK1A        | - | IKKα          | - | MOK          | - | MOK                        | - | SIK3           | - | -            | - | CaMKK2            | - | PIP5K1γ                    | - |
| Cdc7/cyclinB1     | - | DYRK2         | - | IKKβ          | - | MORCKα       | - | MORCKα                     | - | Slk            | - | -            | - | Cdc7/cyclinB1     | - | Pim-1                      | - |
| CDK1/cyclinB      | - | DYRK2         | - | IKKε          | - | MORCKβ       | - | MORCKβ                     | - | Slk            | - | -            | - | CDK1/cyclinB      | - | Pim-2                      | - |
| CDK2/cyclinA      | - | eRF-2K        | - | IR            | - | MSK1         | - | MSK1                       | - | Slk            | - | -            | - | CDK2/cyclinA      | - | Pim-3                      | - |
| CDK2/cyclinE      | - | EGFR          | - | IR act.       | - | MSK2         | - | MSK2                       | - | SNRK           | - | -            | - | CDK2/cyclinE      | - | PKA                        | - |
| CDK3/cyclinE      | - | EGFR (L858R)  | - | IRE1          | - | MSSK1        | - | MSSK1                      | - | Src (I1530)    | - | -            | - | CDK3/cyclinE      | - | PKAcβ                      | - |
| CDK4/cyclinD3     | - | EGFR (T790M)  | - | IRAK1         | - | MST1         | - | MST1                       | - | Src (T341M)    | - | -            | - | CDK4/cyclinD3     | - | SRMs                       | - |
| CDK5/p25          | - | EGFR (T790M)  | - | IRAK4         | - | MST2         | - | MST2                       | - | SRPK1          | - | -            | - | CDK5/p25          | - | SRPK2                      | - |
| CDK5/p35          | - | EGFR (T790M)  | - | Itk           | - | MST4         | - | MST4                       | - | STK16          | - | -            | - | CDK5/p35          | - | STK25                      | - |
| CDK6/cyclinD3     | - | EphA1         | - | JAK1          | - | mTOR         | - | mTOR                       | - | STK32A         | - | -            | - | CDK6/cyclinD3     | - | STK32B                     | - |
| CDK7/cyclinH/MAT1 | - | EphA2         | - | JAK2          | - | mTOR/FKBP12  | - | mTOR/FKBP12                | - | STK32C         | - | -            | - | CDK7/cyclinH/MAT1 | - | STK32C                     | - |
| CDK9/cyclinT1     | - | EphA3         | - | JAK3          | - | MuSK         | - | MuSK                       | - | -              | - | -            | - | CDK9/cyclinT1     | - | -                          | - |
| CDK12/cyclinK     | - | EphA4         | - | JAK3          | - | -            | - | -                          | - | -              | - | -            | - | CDK12/cyclinK     | - | -                          | - |
| CDK13/cyclinK     | - | -             | - | -             | - | -            | - | -                          | - | -              | - | -            | - | CDK13/cyclinK     | - | -                          | - |

\* Potential positive (+) hits (H) verified by follow-up IC<sub>50</sub> second stage determination

Table 4S. Kinome Wide Screen of Compound 3

| Kinase           | Ha | Kinase            | Ha | Kinase       | Ha | Kinase      | Ha | Kinase        | Ha | Kinase      | Ha | Kinase | Ha |
|------------------|----|-------------------|----|--------------|----|-------------|----|---------------|----|-------------|----|--------|----|
| AAK1             | -  | EphA5             | -  | JNK1a1       | -  | MYLK2       | -  | PKCε          | -  | STK33       | -  |        |    |
| Abl              | -  | CDK16/cyclinY     | -  | JNK2a2       | -  | MYO3B       | -  | PKCη          | -  | STK39       | -  |        |    |
| Abl (H396P)      | -  | CDK17/cyclinY     | -  | JNK3         | -  | NDR1        | -  | PKCι          | -  | Syk         | -  |        |    |
| Abl (M35T1)      | -  | CDK18/cyclinY     | -  | KDR          | -  | NDR2        | -  | PKCμ          | -  | TAF1L       | -  |        |    |
| Abl (Q252H)      | -  | CDK1              | -  | LATS1        | -  | NEK1        | -  | PKCθ          | -  | TAK1        | -  |        |    |
| Abl (T315I)      | -  | CDK12             | -  | LATS2        | -  | NEK2        | -  | PKCζ          | -  | TAO1        | -  |        |    |
| Abl (Y253F)      | -  | CDK13             | -  | Lek          | -  | NEK4        | -  | PKD2          | -  | TAO2        | -  |        |    |
| ACK1             | -  | CDKL4             | -  | Lek act.     | -  | NEK3        | -  | PKD3          | +  | TAO3        | -  |        |    |
| ACTR2            | -  | Chak1             | -  | LIMK1        | -  | NEK6        | -  | PKG1α         | -  | TBK1        | -  |        |    |
| ALK              | -  | CHK1              | -  | LIMK2        | -  | NEK7        | -  | PKG1β         | -  | Tec act.    | -  |        |    |
| ALK1             | -  | CHK2              | -  | LKB1         | -  | NEK9        | -  | PKR           | -  | IGFBR1      | -  |        |    |
| ALK2             | -  | CHK2(1157T)       | -  | LOK          | -  | NIM1        | -  | Plk1          | -  | IGFBR2      | -  |        |    |
| ALK4             | -  | CHK2(R145W)       | -  | FGFR1        | -  | NEK11       | -  | Plk3          | -  | Tie2        | -  |        |    |
| ALK6             | -  | CK1α              | +  | LRRK2        | -  | NLK         | -  | Plk4          | -  | Tie2(R849W) | -  |        |    |
| Avg              | -  | CK1ε              | +  | FGFR2        | -  | NUAK2       | -  | PRAK          | -  | Tie2(Y897S) | -  |        |    |
| AMPKα1           | -  | CK1γ1             | -  | FGFR2(N549H) | -  | OSR1        | -  | PRKG2         | -  | TLK1        | -  |        |    |
| AMPKα2           | -  | CK1γ2             | -  | FGFR3        | -  | p70S6K      | -  | PRK1          | -  | TLK2        | -  |        |    |
| A-Raf            | -  | CK1γ3             | -  | MAPK1        | -  | PAK1        | -  | PRK2          | -  | TNIK        | +  |        |    |
| ARK5             | -  | CK1b              | +  | MAPK3        | -  | PAK2        | -  | PRKX          | -  | TRB2        | -  |        |    |
| ASK1             | -  | CK2               | -  | MAP4K4       | -  | PAK3        | -  | PRP4          | -  | TrkA        | -  |        |    |
| ATM              | -  | CK2α1             | -  | MAP4K5       | -  | PAK4        | -  | PTK5          | -  | TrkB        | -  |        |    |
| ATR/ATRIP        | -  | CK2α2             | -  | MAPKAP-K2    | -  | PAK5        | -  | Pyk2          | -  | TRC         | -  |        |    |
| Aurora-A         | -  | CLK1              | -  | MAPKAP-K3    | -  | PAK6        | -  | Ret           | -  | TSSK1       | -  |        |    |
| Aurora-B         | -  | CLK1              | -  | MEK1         | -  | PAR1Bα      | -  | Ret (V804L)   | -  | TSSK2       | -  |        |    |
| Aurora-C         | -  | CLK2              | -  | MEK2         | -  | PASK        | -  | Ret (V804M)   | -  | TSSK3       | -  |        |    |
| Axl              | -  | CLK3              | -  | Fms(Y969C)   | -  | PAK         | -  | RIPK1         | -  | TSSK4       | -  |        |    |
| Btk              | -  | CLK4              | -  | GCK          | -  | MARCK3      | -  | RIPK2         | +  | TTBK1       | -  |        |    |
| Bik              | -  | εKit              | -  | GCN2         | -  | MARRK4      | -  | ROCK-1        | -  | TTBK2       | -  |        |    |
| BMPR2            | -  | εKit(D816V)       | -  | GRK1         | -  | MEKK2       | -  | ROCK-II       | -  | ITK         | -  |        |    |
| Bmx              | -  | εKit(D816H)       | -  | GRK2         | -  | MEKK3       | -  | Ron           | -  | Ixx         | -  |        |    |
| BRK              | -  | εKit(V360G)       | -  | GRK3         | -  | MELK        | -  | Ros           | -  | TYR2        | -  |        |    |
| BsSK1            | -  | CRK               | -  | GRK5         | -  | Mer         | -  | Rse           | -  | ULK1        | -  |        |    |
| BsSK2            | -  | CRK               | -  | GRK6         | -  | Met         | -  | Rsk1          | -  | ULK2        | -  |        |    |
| BTK              | -  | CSK               | -  | GRK7         | -  | Met(D1246H) | -  | Rsk2          | -  | ULK3        | -  |        |    |
| BTK(R28H)        | -  | e-RAF             | -  | GSK3α        | -  | Met(D1246N) | -  | Rsk3          | -  | VRK1        | -  |        |    |
| B-Raf            | -  | sSRC              | -  | GSK3β        | -  | Met(M1268T) | -  | Rsk4          | -  | VRK2        | -  |        |    |
| B-Raf (V599E)    | -  | DAPK1             | -  | Haspin       | -  | Met(Y1248C) | -  | SAPK2α        | +  | Wee1        | -  |        |    |
| CaMKI            | -  | DAPK2             | -  | Hck          | -  | Met(Y1248D) | -  | SAPK2α(T106M) | -  | Wee1B       | -  |        |    |
| CaMKIβ           | -  | DCAMK1L1          | -  | Hck act.     | -  | Met(Y1248H) | -  | SAPK2β        | -  | WNK1        | -  |        |    |
| CaMKIγ           | -  | DCAMK1L2          | -  | HIPK1        | -  | MINK        | -  | SAPK3         | -  | WNK2        | -  |        |    |
| CaMKIIα          | -  | DDR1              | -  | HIPK2        | -  | MKK3        | -  | SAPK4         | -  | WNK3        | -  |        |    |
| CaMKIIβ          | -  | DDR2              | -  | HIPK3        | -  | MLCK        | -  | SBK1          | -  | WNK4        | -  |        |    |
| CaMKIγ           | -  | DMPK              | -  | HPK1         | -  | MLK1        | -  | SGK           | -  | Yes         | -  |        |    |
| CaMKIδ           | -  | DNA-PK            | -  | IRI          | -  | MLK2        | -  | SGK2          | -  | ZAK         | -  |        |    |
| CaMKIθ           | -  | DRAK1             | -  | ICK          | -  | MLK3        | -  | SGK3          | -  | ZAP-70      | -  |        |    |
| CaMKIV           | -  | DRAK2             | -  | IGF-IR       | -  | Mnk2        | -  | SIK           | -  | ZIPK        | -  |        |    |
| CaMKK1           | -  | DYRK1A            | -  | IGF-IR act.  | -  | MOK         | -  | SIK2          | -  |             |    |        |    |
| CaMKK2           | -  | DYRK2             | -  | IKKα         | -  | MRCCKα      | -  | SIK3          | -  |             |    |        |    |
| Cdc7/cyclinB1    | -  | DYRK3             | -  | IKKβ         | -  | MRCCKβ      | -  | Slk           | -  |             |    |        |    |
| CDK1/cyclinB     | -  | EF-2K             | -  | IR           | -  | MSK1        | -  | Slm-2         | -  |             |    |        |    |
| CDK2/cyclinA     | -  | EGFR              | -  | IR act.      | -  | MSK2        | -  | Slm-3         | -  |             |    |        |    |
| CDK2/cyclinE     | -  | EGFR(L858R)       | -  | IRE1         | -  | MSSK1       | -  | PKA           | -  |             |    |        |    |
| CDK3/cyclinE     | -  | EGFR(L861Q)       | -  | IRR          | -  | MST1        | -  | PKAαβ         | -  |             |    |        |    |
| CDK4/cyclinD3    | -  | EGFR(T790M)       | -  | IRAK1        | -  | MST2        | -  | PKBa          | -  |             |    |        |    |
| CDK5/p25         | -  | EGFR(T790M.L858R) | -  | IRAK4        | -  | MST3        | -  | PKBβ          | -  |             |    |        |    |
| CDK6/cyclinD3    | -  | EphA1             | -  | Itk          | -  | MST4        | -  | PKCα          | -  |             |    |        |    |
| CDK7/cyclinHMAT1 | -  | EphA2             | -  | JAK1         | -  | mTOR        | -  | PKCβ          | -  |             |    |        |    |
| CDK9/cyclin T1   | -  | EphA3             | -  | JAK2         | -  | mTOR/FKBP12 | -  | PKCγ          | -  |             |    |        |    |
| CDK12/cyclinK    | -  | EphA4             | -  | JAK3         | -  | MuSK        | -  | PKCδ          | -  |             |    |        |    |
| CDK13/cyclinK    | -  |                   | -  |              | -  |             | -  |               | -  |             |    |        |    |

a Potential positive (+) hits (H) verified by follow-up IC50 second stage determination as described in text

**Table 5S. SMILE**

|               |                                                                            |  |  |
|---------------|----------------------------------------------------------------------------|--|--|
| 1             | <chem>C1C1=NN=C(C2=CC=CC=C2)C(=C1)C1=CC=NC=C1</chem>                       |  |  |
| 2             | <chem>C1(C2=NN=C(N3CCN(C4=NC=CC=N4)CC3)C(C5=CC=NC=C5)=C2)=CC=CC=C1</chem>  |  |  |
| 3             | <chem>C1(C2=NN=C(N3CCN(C4=NC=CC=N4)CC3)C=C2C5=CC=NC=C5)=CC=CC=C1</chem>    |  |  |
| 4             | <chem>CN(CC1)CCN1C(C=C2C3=CC=NC=C3)=NN=C2C4=CC=CC=C4</chem>                |  |  |
| 5             | <chem>C1(C2=CC=NC=C2)=CC(N3CCNCC3)=NN=C1C4=CC=CC=C4</chem>                 |  |  |
| 6             | <chem>CCN(CC)C1=NN=C(C2=CC=CC=C2)C(C3=CC=NC=C3)=C1</chem>                  |  |  |
| 7             | <chem>CN(CCC)C1=NN=C(C2=CC=CC=C2)C(C3=CC=NC=C3)=C1</chem>                  |  |  |
| 8             | <chem>CN(C)C1=NN=C(C2=CC=CC=C2)C(C3=CC=NC=C3)=C1</chem>                    |  |  |
| 9             | <chem>CN(C)C1=NN=C(C2=CC=CC3=C2C=CC=C3)C(C4=CC=NC=C4)=C1</chem>            |  |  |
| 10            | <chem>CN(C)C1=NN=C(C2=CC=C(C=CC=C3)C3=C2)C(C4=CC=NC=C4)=C1</chem>          |  |  |
| 11            | <chem>CN(CC1)CCN1C(C=C2C3=CC=NC=C3)=NN=C2C4=CC5=C(C=CC=C5)C=C4</chem>      |  |  |
| 12            | <chem>CN1CCN(CC1)C1=NN=C(C2=CC3=C(C=C2)C=C(F)C=C3)C(=C1)C1=CC=NC=C1</chem> |  |  |
| 13            | <chem>CN1CCN(CC1)C1=NN=C(C2=CC3=C(C=CC(F)=C3)C=C2)C(=C1)C1=CC=NC=C1</chem> |  |  |
| 14            | <chem>CN1CCN(CC1)C1=NN=C(C2=CC3=C(C=CC=C3F)C=C2)C(=C1)C1=CC=NC=C1</chem>   |  |  |
| 15            | <chem>CN(CC1)CCN1C(C=C2C3=CC=NC=C3)=NN=C2C4=CC5=C(C(F)=CC=C5)C=C4</chem>   |  |  |
| 16            | <chem>CN(CC1)CCN1C2=NN=C(C3=CC=C(NC=C4)C4=C3)C(C5=CC=NC=C5)=C2</chem>      |  |  |
| 17            | <chem>C1CN(CCN1)C1=NN=C(C2=CC3=CC=CC=C3C=C2)C(=C1)C1=CC=NC=C1</chem>       |  |  |
| 18            | <chem>C1(C=CC=C2)=C2C=C(C3=NN=C(N4CCCC4)C=C3C5=CC=NC=C5)C=C1</chem>        |  |  |
| 19            | <chem>C1(C=CC=C2)=C2C=C(C3=NN=C(N4CCCC4)C=C3C5=CC=NC=C5)C=C1</chem>        |  |  |
| 20            | <chem>C1(C=CC=C2)=C2C=C(C3=NN=C(N4CCC4)C=C3C5=CC=NC=C5)C=C1</chem>         |  |  |
| MW01-4-119SRM | <chem>C1(C2=NN=C(N3CCN(C4=NC=CC=N4)CC3)C=C2C5=CC=CN=C5)=CC=CC=C1</chem>    |  |  |
| MW01-3-183WH  | <chem>C1(C2=NN=C(N3CCN(C4=NC=CC=N4)CC3)C=C2)=CC=CC=C1</chem>               |  |  |

**Table 6S. Analytical data for compounds listed in Table 1 & Table 2**

| Compound      | Analytical                                                                                                                                                                                                                                                                                                                                                                                                                                                                                                                                |
|---------------|-------------------------------------------------------------------------------------------------------------------------------------------------------------------------------------------------------------------------------------------------------------------------------------------------------------------------------------------------------------------------------------------------------------------------------------------------------------------------------------------------------------------------------------------|
| 4<br>(MW066)  | 89% (gravimetric) yield, purity >97% by HPLC. <sup>1</sup> H NMR (CDCl <sub>3</sub> ) δ 8.57 (dd, <i>J</i> = 1.55, 4.5 Hz, 2H), 7.34-7.24 (m, 5H), 7.12 (dd, <i>J</i> = 1.6 Hz, <i>J</i> = 4.2 Hz, 2H), 6.84 (s, 1H), 3.81 (t, <i>J</i> = 4.5 Hz, <i>J</i> = 4.6 Hz, 4H), 2.60 (s, 4H), 2.39 (s, 3H); HRMS calculated for C <sub>20</sub> H <sub>22</sub> N <sub>4</sub> , 331.1797, found 331.1783.                                                                                                                                      |
| 5<br>(MW123)  | 50% (gravimetric) yield, purity >97% by HPLC. <sup>1</sup> H NMR (500 MHz, CDCl <sub>3</sub> ) δ 8.47 (dd, <i>J</i> = 1.65, 1.75, 2H), 7.35-7.30 (m, 2H), 7.29-7.27 (m, 7H), 3.75-3.73 (m, 4H), 2.99-2.97 (m, 4H). HRMS calculated for C <sub>19</sub> H <sub>20</sub> N <sub>4</sub> , 317.16405, found 317.16525                                                                                                                                                                                                                        |
| 6<br>(MW177)  | 70% (gravimetric) yield, purity >96% by HPLC. <sup>1</sup> H NMR (CDCl <sub>3</sub> ) δ 8.57 (d, <i>J</i> = 5.75 Hz, 2H), 7.34-7.23 (m, 5H), 7.14 (dd, <i>J</i> = 1.55 Hz, <i>J</i> = 4.45 Hz, 2H), 6.64 (s, 1H), 3.71 (dd, <i>J</i> = 7.1 Hz, <i>J</i> = 7.1 Hz, 4H), 1.29 (t, <i>J</i> = 7.1 Hz, <i>J</i> = 9 Hz, 6H); HRMS calculated for C <sub>19</sub> H <sub>20</sub> N <sub>4</sub> , 304.1688, found 304.1682.                                                                                                                   |
| 7<br>(MW207)  | 74% (gravimetric) yield, purity >96% by HPLC. <sup>1</sup> H NMR (CD <sub>3</sub> OD) δ 8.47 (dd, <i>J</i> = 1.6, 4.55 Hz, 2H), 7.32-7.25 (m, 7H), 7.08 (s, 1H), 3.69 (t, <i>J</i> = 7.4 Hz, <i>J</i> = 7.4 Hz, 2H), 3.22 (s, 3H), 1.74 (m, 2H), 0.99 (t, <i>J</i> = 7, 7.45 Hz, 3H); HRMS calculated for C <sub>19</sub> H <sub>20</sub> N <sub>4</sub> , 304.1688, found 304.1699.                                                                                                                                                      |
| 8<br>(MW105)  | 90% (gravimetric) yield, purity >98% by HPLC. <sup>1</sup> H NMR (CDCl <sub>3</sub> ) δ 8.57 (d, <i>J</i> = 5.8 Hz, 2H), 7.34-7.24 (m, 5H), 7.14 (dd, <i>J</i> = 1.5 Hz, <i>J</i> = 4.65, 2H), 6.72 (s, 1H), 3.27 (s, 6H); HRMS calculated for C <sub>17</sub> H <sub>16</sub> N <sub>4</sub> , 276.1375, found 276.1384                                                                                                                                                                                                                  |
| 10<br>(MW108) | 52% (gravimetric) yield, purity 96% by HPLC. <sup>1</sup> H NMR (CDCl <sub>3</sub> ) δ 8.55 (d, <i>J</i> = 5.65 Hz, 2H), 7.93 (s, 1H), 7.80-7.68 (m, 3H), 7.49-7.34 (m, 3H), 7.19 (d, <i>J</i> = 5.95 Hz, 2H), 6.76 (s, 1H), 3.30 (s, 6H); HRMS calculated for C <sub>21</sub> H <sub>18</sub> N <sub>4</sub> , 326.1531, found 326.1538.                                                                                                                                                                                                 |
| 12<br>(MW203) | 41% (gravimetric) yield, purity >96% by HPLC. <sup>1</sup> H NMR (300 MHz, CDCl <sub>3</sub> ) δ 8.56 (d, <i>J</i> = 5.8 Hz, 2H), 7.94 (s, 1H), 7.71 (dd, <i>J</i> = 9.1 Hz, <i>J</i> = 5.6 Hz, 1H), 7.64 (d, <i>J</i> = 8.5 Hz, 1H), 7.39 (m, 2H), 7.21 (ddd, <i>J</i> = 8.8 Hz, <i>J</i> = 8.8 Hz, <i>J</i> = 2.6 Hz, 1H), 7.15 (dd, <i>J</i> = 4.4 Hz, <i>J</i> = 1.8 Hz, 2H), 6.87 (s, 1H), 3.82 (m, 4H), 2.61 (m, 4H), 2.39 (s, 3H); HRMS calculated for C <sub>24</sub> H <sub>22</sub> FN <sub>3</sub> , 399.1859, found 399.1865. |
| 13<br>(MW017) | 54% (gravimetric) yield, purity >96% by HPLC. <sup>1</sup> H NMR (300 MHz, CDCl <sub>3</sub> ) δ 8.56 (d, <i>J</i> = 6.1 Hz, 2H), 7.89 (s, 1H), 7.78 (dd, <i>J</i> = 8.8 Hz, <i>J</i> = 5.6 Hz, 1H), 7.69 (d, <i>J</i> = 8.5 Hz, 1H), 7.37-7.722 (m, 3H), 7.15 (dd, <i>J</i> = 4.4 Hz, <i>J</i> = 1.2 Hz, 2H), 6.88 (s, 1H), 3.83 (m, 4H), 2.62 (m, 4H), 2.40 (s, 3H); HRMS calculated for C <sub>24</sub> H <sub>22</sub> FN <sub>3</sub> , 399.1859, found 399.1865.                                                                    |
| 14<br>(MW032) | 45% (gravimetric) yield, purity >96% by HPLC. <sup>1</sup> H NMR (300 MHz, CDCl <sub>3</sub> ) δ 8.55 (d, <i>J</i> = 5.8 Hz, 2H), 8.16 (s, 1H), 7.73 (dd, <i>J</i> = 8.6 Hz, <i>J</i> = 1.5 Hz, 1H), 7.58 (d, <i>J</i> = 8.2 Hz, 1H), 7.42 (dd, <i>J</i> = 8.4 Hz, <i>J</i> = 1.8 Hz, 1H), 7.43-7.35 (m, 1H), 7.14 (dd, <i>J</i> = 4.7 Hz, <i>J</i> = 1.5 Hz, 2H), 7.10 (m, 1H), 6.88 (s, 1H), 3.83 (m, 4H), 2.62 (m, 4H), 2.39 (s, 3H); HRMS calculated for C <sub>24</sub> H <sub>22</sub> FN <sub>3</sub> , 399.1859, found 399.1867.  |
| 15<br>(MW044) | 28% (gravimetric) yield, purity >97% by HPLC. <sup>1</sup> H NMR (300 MHz, CDCl <sub>3</sub> ) δ 8.56 (d, <i>J</i> = 5.9 Hz, 2H), 7.96 (dd, <i>J</i> = 3.5 Hz, <i>J</i> = 5.0 Hz, 1H), 7.51 (d, <i>J</i> = 8.5 Hz, 1H), 7.42 (dd, <i>J</i> = 8.5 Hz, <i>J</i> = 1.2 Hz, 2H), 7.40-7.34 (m, 1H), 7.18-7.10 (m, 3H), 6.88 (s, 1H), 3.84 (m, 4H), 2.62 (m, 4H), 2.40 (s, 3H); HRMS calculated for C <sub>24</sub> H <sub>22</sub> FN <sub>3</sub> , 399.1859, found 399.1866.                                                                |
| 16<br>(MW118) | 57% (gravimetric) yield, purity >96% by HPLC. <sup>1</sup> H NMR (500 MHz, DMSO- <i>d</i> <sub>6</sub> ) δ 11.16 (b, 1H); 8.49 (d, <i>J</i> = 5 Hz, 2H), 7.49 (d, <i>J</i> = 5 Hz, 1H), 7.34 (m, 1H), 7.28-7.23 (m, 4H), 6.93 (dd, <i>J</i> = 5 Hz, <i>J</i> = 10 Hz, 1H), 6.37 (bs 1H), 3.70 (m, 4H), 2.67 (m, 4H), 2.25 (s, 3H); HRMS calculated for C <sub>23</sub> H <sub>22</sub> N <sub>6</sub> , 370.19059, found 370.18888.                                                                                                       |

|               |                                                                                                                                                                                                                                                                                                                                                                                                                                                                                                                             |
|---------------|-----------------------------------------------------------------------------------------------------------------------------------------------------------------------------------------------------------------------------------------------------------------------------------------------------------------------------------------------------------------------------------------------------------------------------------------------------------------------------------------------------------------------------|
| 17<br>(MW154) | 97% (gravimetric) yield, purity >95% by HPLC. <sup>1</sup> H NMR (CDCl <sub>3</sub> ) δ 8.56 (dd, <i>J</i> = 4.7, 1.7 Hz, 2H), 7.94 (bs, 1H), 7.82-7.69 (m, 2H), 7.70 (s, 1H), 7.52-7.43 (m, 2H), 7.35 (dd, <i>J</i> = 8.0 Hz, <i>J</i> = 1.8 Hz, 1H), 7.18-7.12 (m, 2H), 6.93 (d, <i>J</i> = 16.7 Hz, 1H), 4.19 (m, 2H), 3.83 (m, 2H), 3.42 (m, 2H), 3.18 (bs, 1H), 2.79 (m, 2H); ESI-MS <i>m/z</i> : 368 [M+H] <sup>+</sup> .                                                                                             |
| 18<br>(MW086) | 95% (gravimetric) yield, purity >95% by HPLC. <sup>1</sup> H NMR (300 MHz, CDCl <sub>3</sub> ) δ 8.54 (d, <i>J</i> = 5.2 Hz, 2H), 7.94 (s, 1H), 7.80 (dd, <i>J</i> = 5.6 Hz, <i>J</i> = 2.6 Hz, 1H), 7.75-7.67 (m, 2H), 7.50-7.40 (m, 2H), 7.37 (dd, <i>J</i> = 6.5 Hz, <i>J</i> = 1.8 Hz, 1H), 7.16 (dd, <i>J</i> = 4.4 Hz, <i>J</i> = 1.4 Hz, 2H), 3.79 (bs, 4H), 1.75 (bs, 6H); ESI-MS <i>m/z</i> : 367 [M+H] <sup>+</sup> .                                                                                             |
| 19<br>(MW148) | 83% (gravimetric) yield, purity >95% by HPLC. <sup>1</sup> H NMR (300 MHz, CDCl <sub>3</sub> ) δ 8.54 (dd, <i>J</i> = 4.7 Hz, <i>J</i> = 1.8 Hz, 2H), 7.92 (s, 1H), 7.82-7.77 (m, 1H), 7.73-7.69 (m, 1H), 7.69 (d, <i>J</i> = 8.5 Hz, 1H), 7.50-7.41 (m, 2H), 7.38 (dd, <i>J</i> = 8.5 Hz, <i>J</i> = 1.7 Hz, 1H), 7.16 (dd, <i>J</i> = 4.4 Hz, <i>J</i> = 1.5 Hz, 2H), 6.60 (s, 1H), 3.65 (m, 4H), 2.12 (m, 4H); ESI-MS <i>m/z</i> : 353.20 [M+H] <sup>+</sup> .                                                           |
| 20<br>(MW146) | 98% (gravimetric) yield, purity >95% by HPLC. <sup>1</sup> H NMR (300 MHz, CDCl <sub>3</sub> ) δ 8.53 (dd, <i>J</i> = 4.4 Hz, <i>J</i> = 1.5 Hz, 2H), 7.90 (d, <i>J</i> = 1.0 Hz, 1H), 7.82-7.77 (m, 1H), 7.73-7.69 (m, 1H), 7.69 (d, <i>J</i> = 8.8 Hz, 1H), 7.51-7.41 (m, 2H), 7.35 (dd, <i>J</i> = 8.5 Hz, <i>J</i> = 1.8 Hz, 1H), 7.13 (dd, <i>J</i> = 4.4 Hz, <i>J</i> = 1.5 Hz, 2H), 6.50 (s, 1H), 4.28 (dd, <i>J</i> = 7.7 Hz, <i>J</i> = 7.7 Hz, 4H), 2.55 (m, 2H); ESI-MS <i>m/z</i> : 339.13 [M+H] <sup>+</sup> . |

**Table 7S. X-ray crystal structure of GMP API**

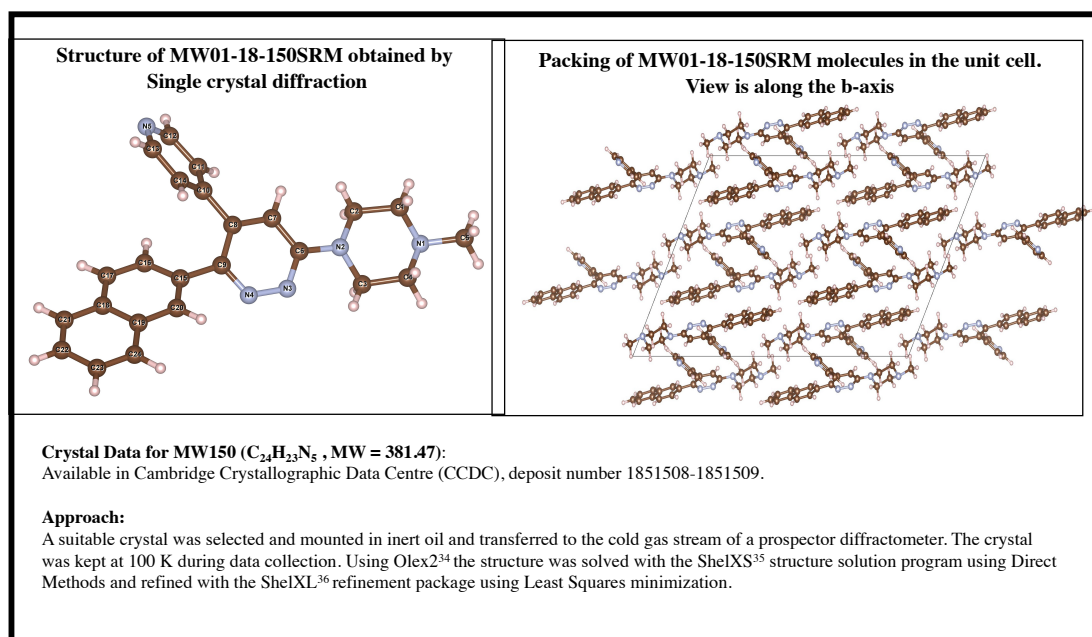



**Table 8S. Compound 11 (API) Features**

| Feature               | Information                                                                                                                                                                                                                                                                                                         |
|-----------------------|---------------------------------------------------------------------------------------------------------------------------------------------------------------------------------------------------------------------------------------------------------------------------------------------------------------------|
| CAS Number            | 1628502-91-9                                                                                                                                                                                                                                                                                                        |
| Molecular Weight      | 381.47                                                                                                                                                                                                                                                                                                              |
| Physical Appearance   | Light yellow, crystalline                                                                                                                                                                                                                                                                                           |
| LogP                  | 2.80 ± 0.12                                                                                                                                                                                                                                                                                                         |
| PSA                   | 45.15                                                                                                                                                                                                                                                                                                               |
| Melting Point (DSC)   | Single endotherm: Extrapolated Onset: 189.4°C<br>$\Delta H_f = 101.6$ J/g                                                                                                                                                                                                                                           |
| XRD                   | monoclinic, no polymorphs, no water or solvent                                                                                                                                                                                                                                                                      |
| TGA                   | congruence of crystal & powder results                                                                                                                                                                                                                                                                              |
| Crystal Structure     | Space group: C2/c (no.15)<br>Unit cell: a = 28.090(11) Å, b = 9.296(4) Å, c = 17.273(6) Å, $\alpha$ 90°, $\beta$ = 116.996(8)°, $\gamma$ 90°<br>Cell volume: 4019 (3) Å <sup>3</sup><br>T = 100K,<br>$\mu(\text{CuK}\alpha) = 0.605$ mm <sup>-1</sup><br>$D_{\text{calc}} = 1.261$ g/mm <sup>3</sup><br>Z, Z': 8, 1 |
| pKa                   | Potentiometric: 3.83 ± 0.44; 7.27 ± 0.21<br>UV-metric: 3.62 ± 0.12; 7.27 ± 0.09                                                                                                                                                                                                                                     |
| Stability (24h, 37°C) | % remaining: 100 at pH 7.0 & pH13.0; 87 at pH 1.0                                                                                                                                                                                                                                                                   |
| Purity                | 99.0 wt % (anhydrous, solvent-free basis)<br>99.6 area% by HPLC                                                                                                                                                                                                                                                     |

Table 9S. Structures for Human p38 $\alpha$ MAPK:Compound Complexes and GMP API Drug

| Database Identification                                                                                                                                                                   | Compound                                                                            | Compound pKa (potentiometric)       |
|-------------------------------------------------------------------------------------------------------------------------------------------------------------------------------------------|-------------------------------------------------------------------------------------|-------------------------------------|
| PDB 4ZTH (p38 $\alpha$ MAPK:Compound 1)<br>DOI: 10.2210/pdb4ZTH/pdb                                                                                                                       | 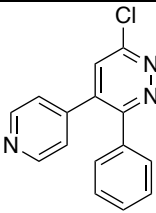   | 3.83 $\pm$ 0.08                     |
| PDB 4EWQ (p38 $\alpha$ MAPK:Compound 3)<br>DOI: 10.2210/pdb4EWQ/pdb                                                                                                                       |    | 4.60 $\pm$ 0.30;<br>4.18 $\pm$ 0.18 |
| PDB 4F9Y (p38 $\alpha$ MAPK:Compound 9)<br>DOI: 10.2210/pdb4F9Y/pdb                                                                                                                       |   | 4.72 $\pm$ 0.27;<br><3.5            |
| PDB 4F9W (p38 $\alpha$ MAPK:Compound 10)<br>DOI: 10.2210/pdb4F9W/pdb                                                                                                                      |  | 4.48 $\pm$ 0.09;<br><3.5            |
| PDB 4R3C (p38 $\alpha$ MAPK:Compound 11)<br>DOI: 10.2210/pdb4R3C/pdb<br><br>CCDC (MW150 GMP API) *<br>1851508-1851509<br>DOI: 10.5517/ccdc.csd.cc204n2x<br>DOI: 10.5517/ccdc.csd.cc204n3y |  | 3.83 $\pm$ 0.44;<br>7.27 $\pm$ 0.21 |

\*CCDC = Cambridge Crystallographic Data Centre

GMP API = Good Manufacturing Practice Active Pharmaceutical Ingredient

04042019\_SRM-18-150.10.fid [Compound 11]  
PROTON CDCI3 /home/walkon/data/Watterson smr779210

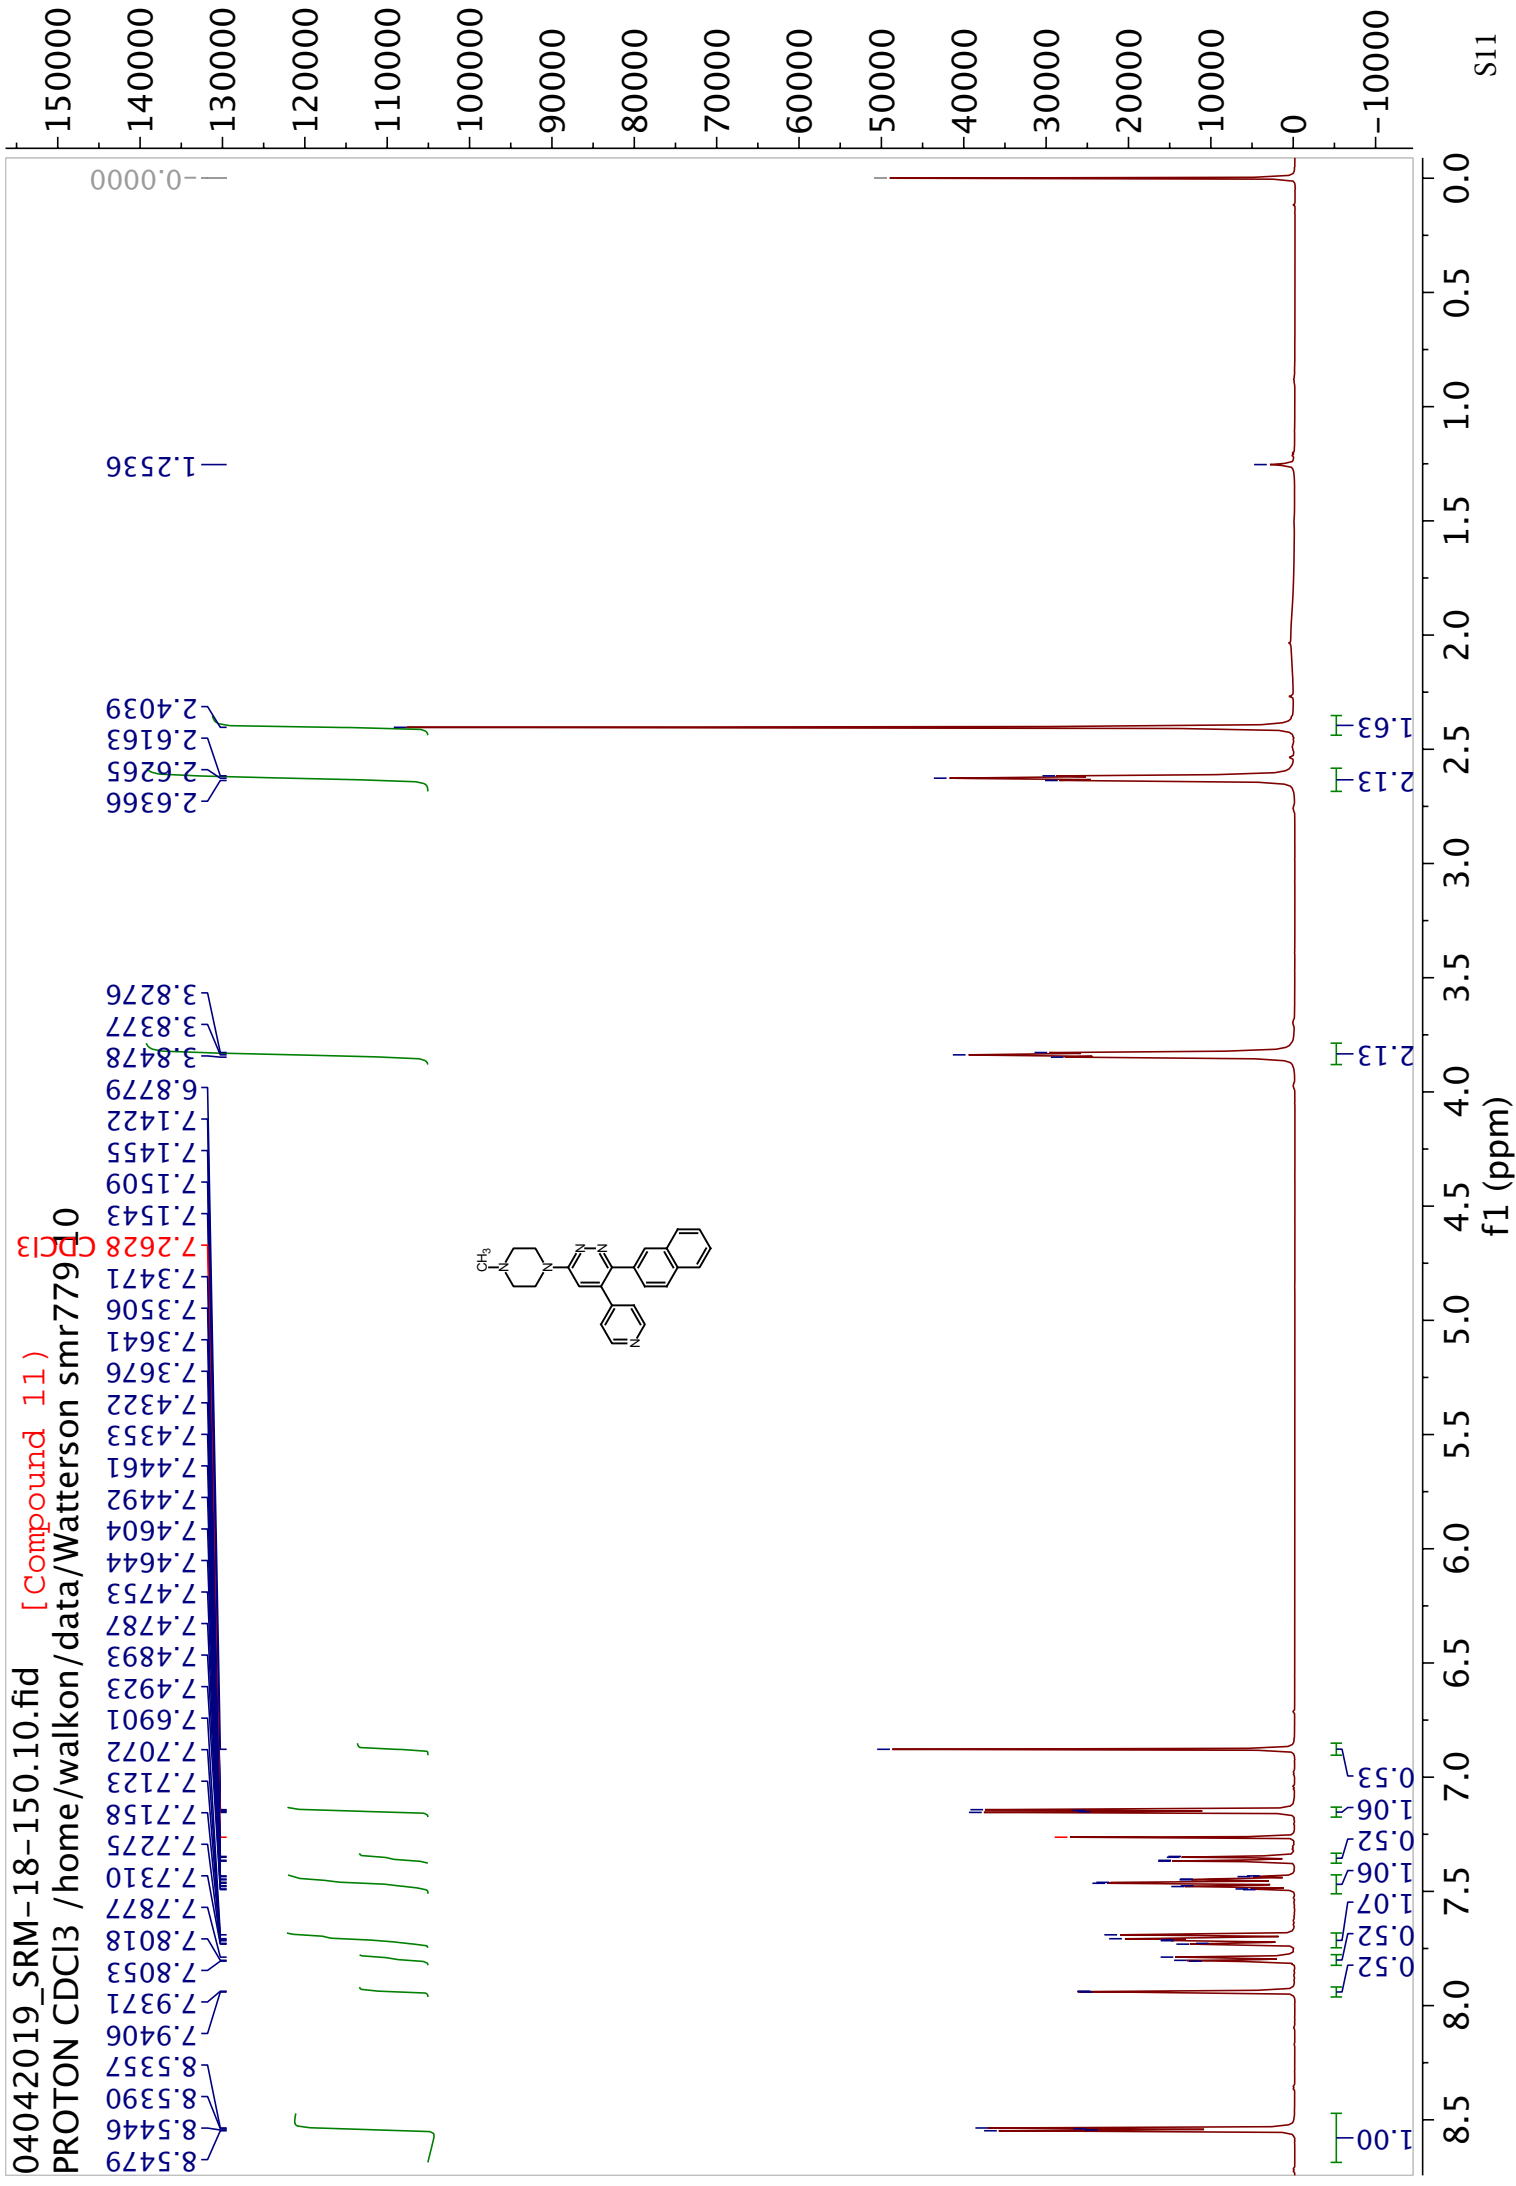

f1 (ppm)

S11

04042019\_SRM-18-150.10.fid [Compound 11]  
PROTON CDCI3 /home/walkon/data/Watterson smr779 10

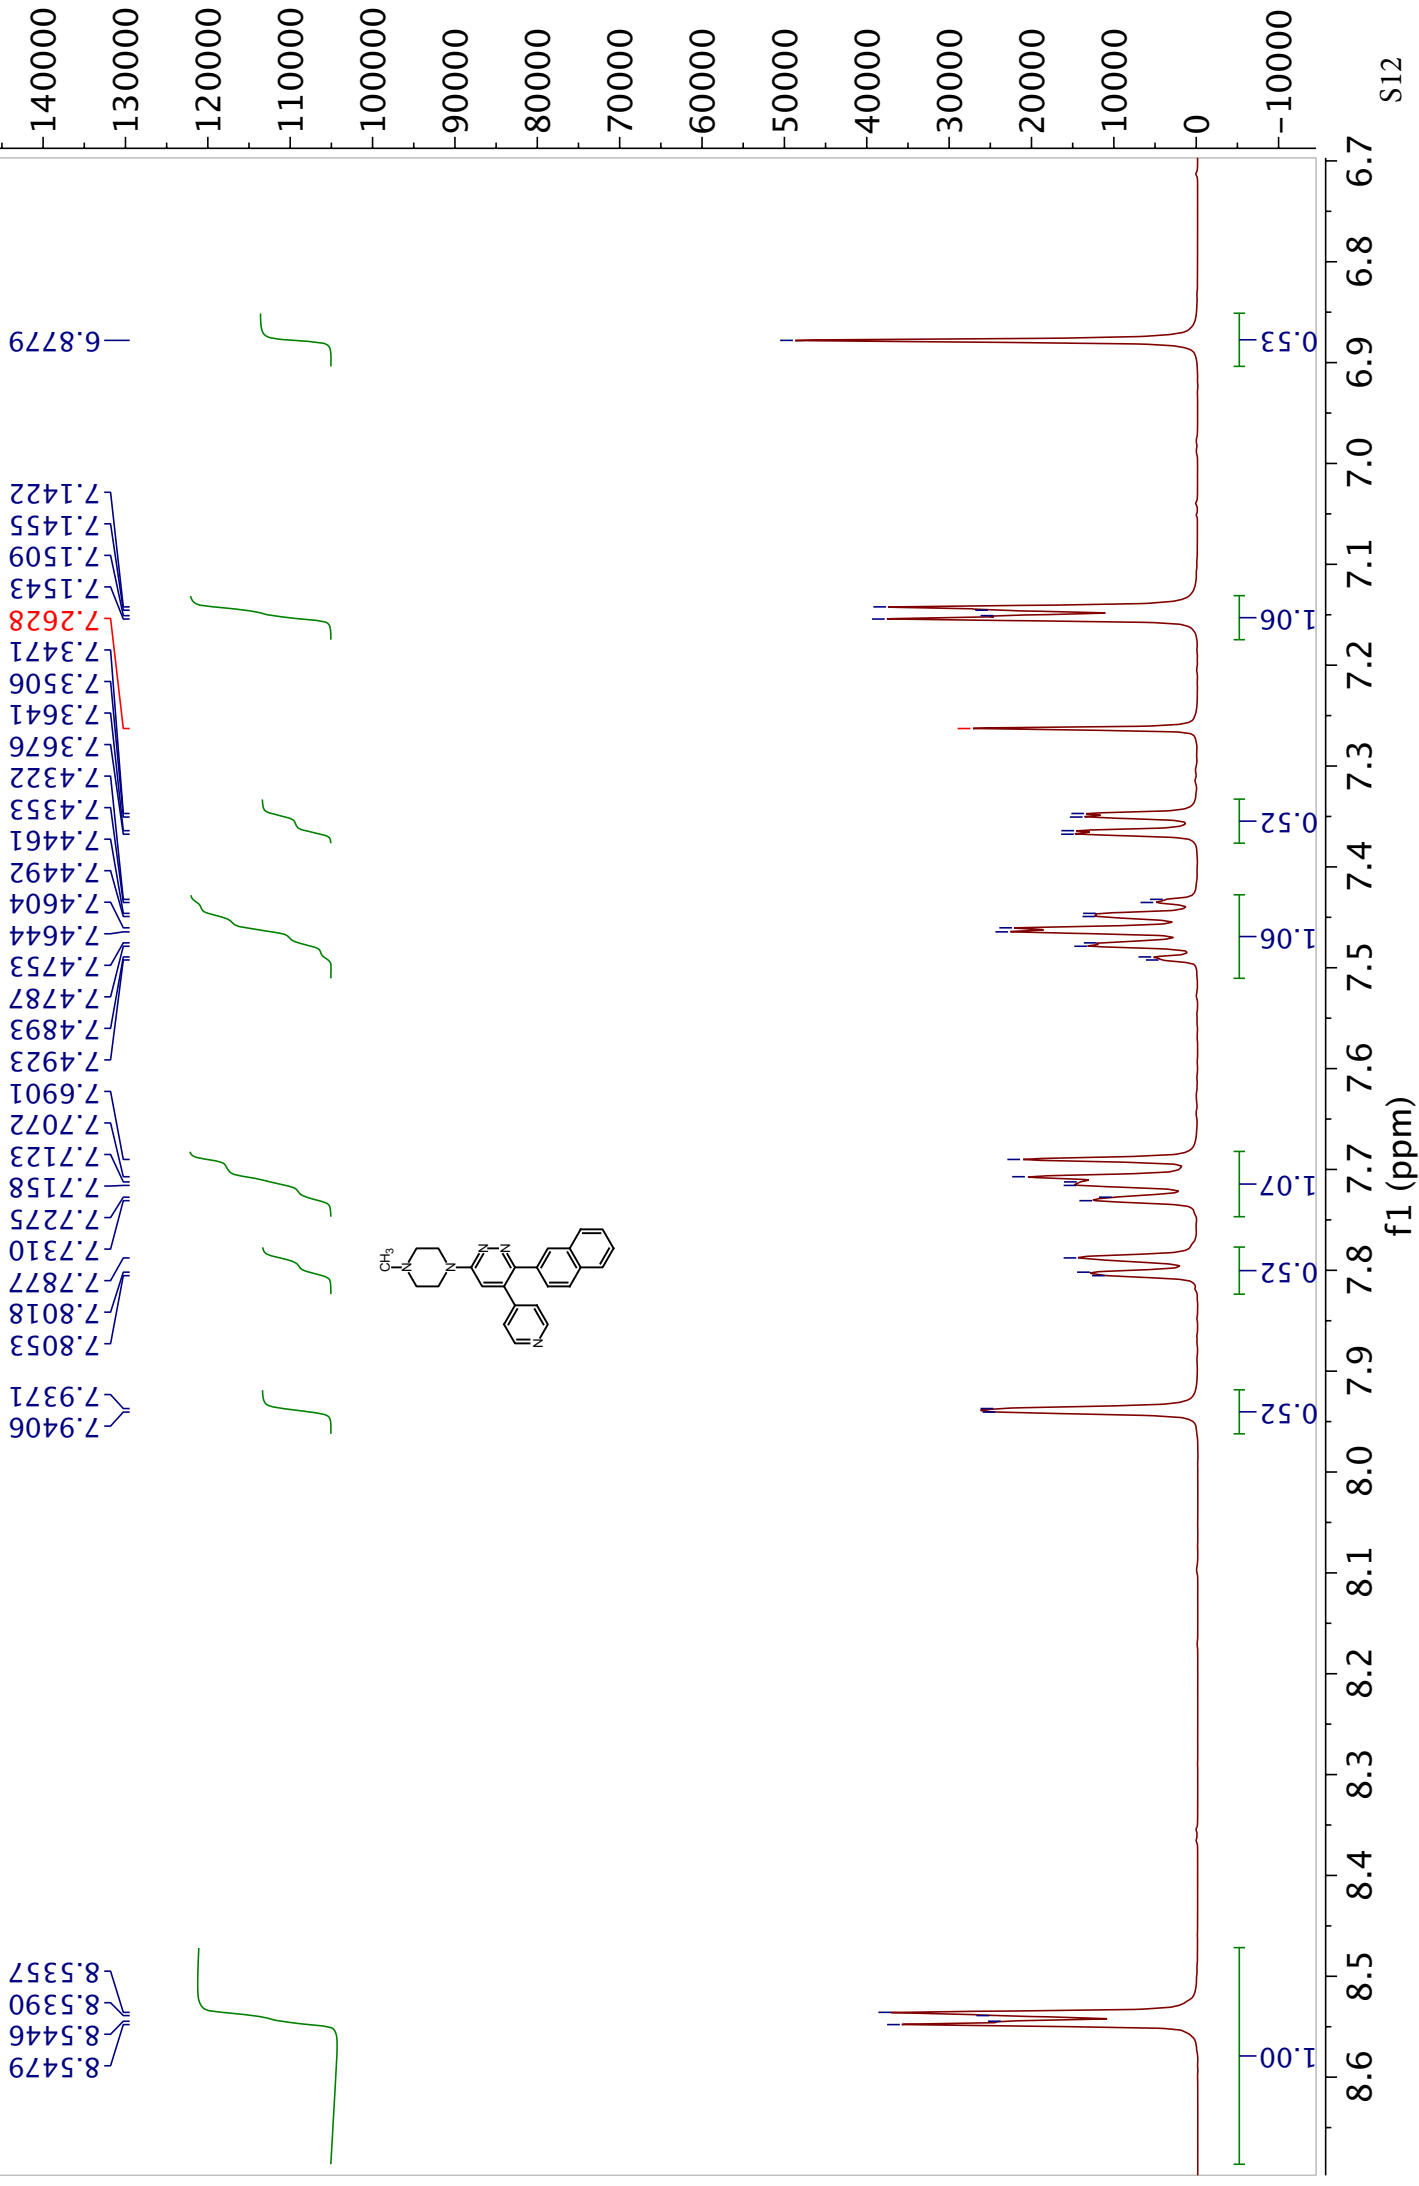

04042019\_SRM-10-181.10.fid  
PROTON CDCI3 /home/walkon/data/Watterson smr779 9

(Compound 9)

250000  
200000  
150000  
100000  
50000  
0

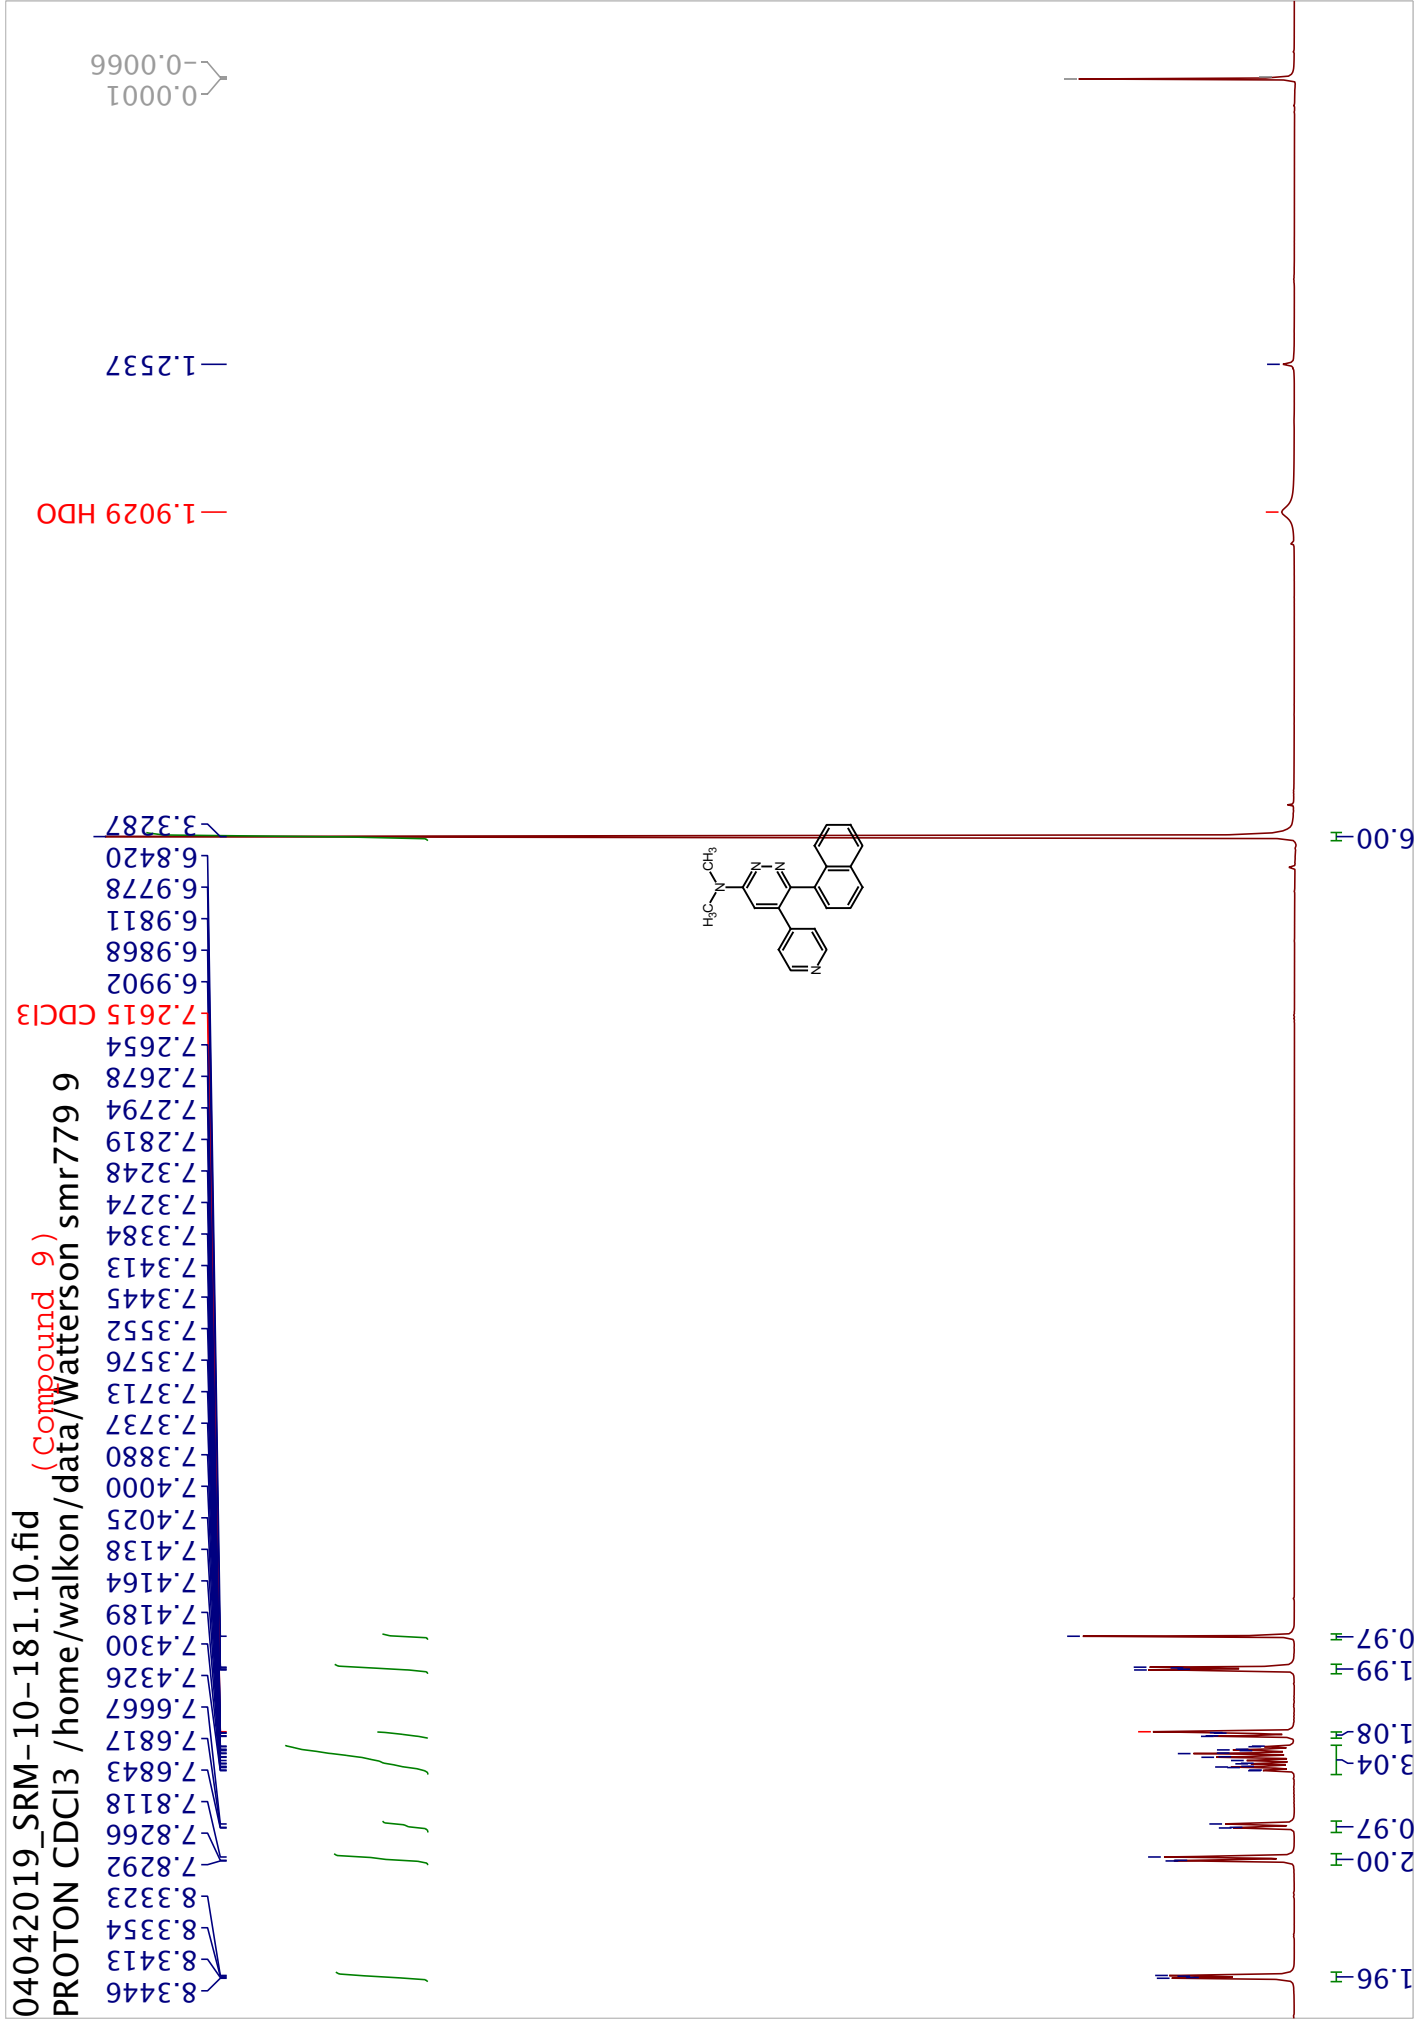

04042019\_SRM-10-181.10.fid  
PROTON CDCI3 /home/walkon/data/Watterson smr779 9

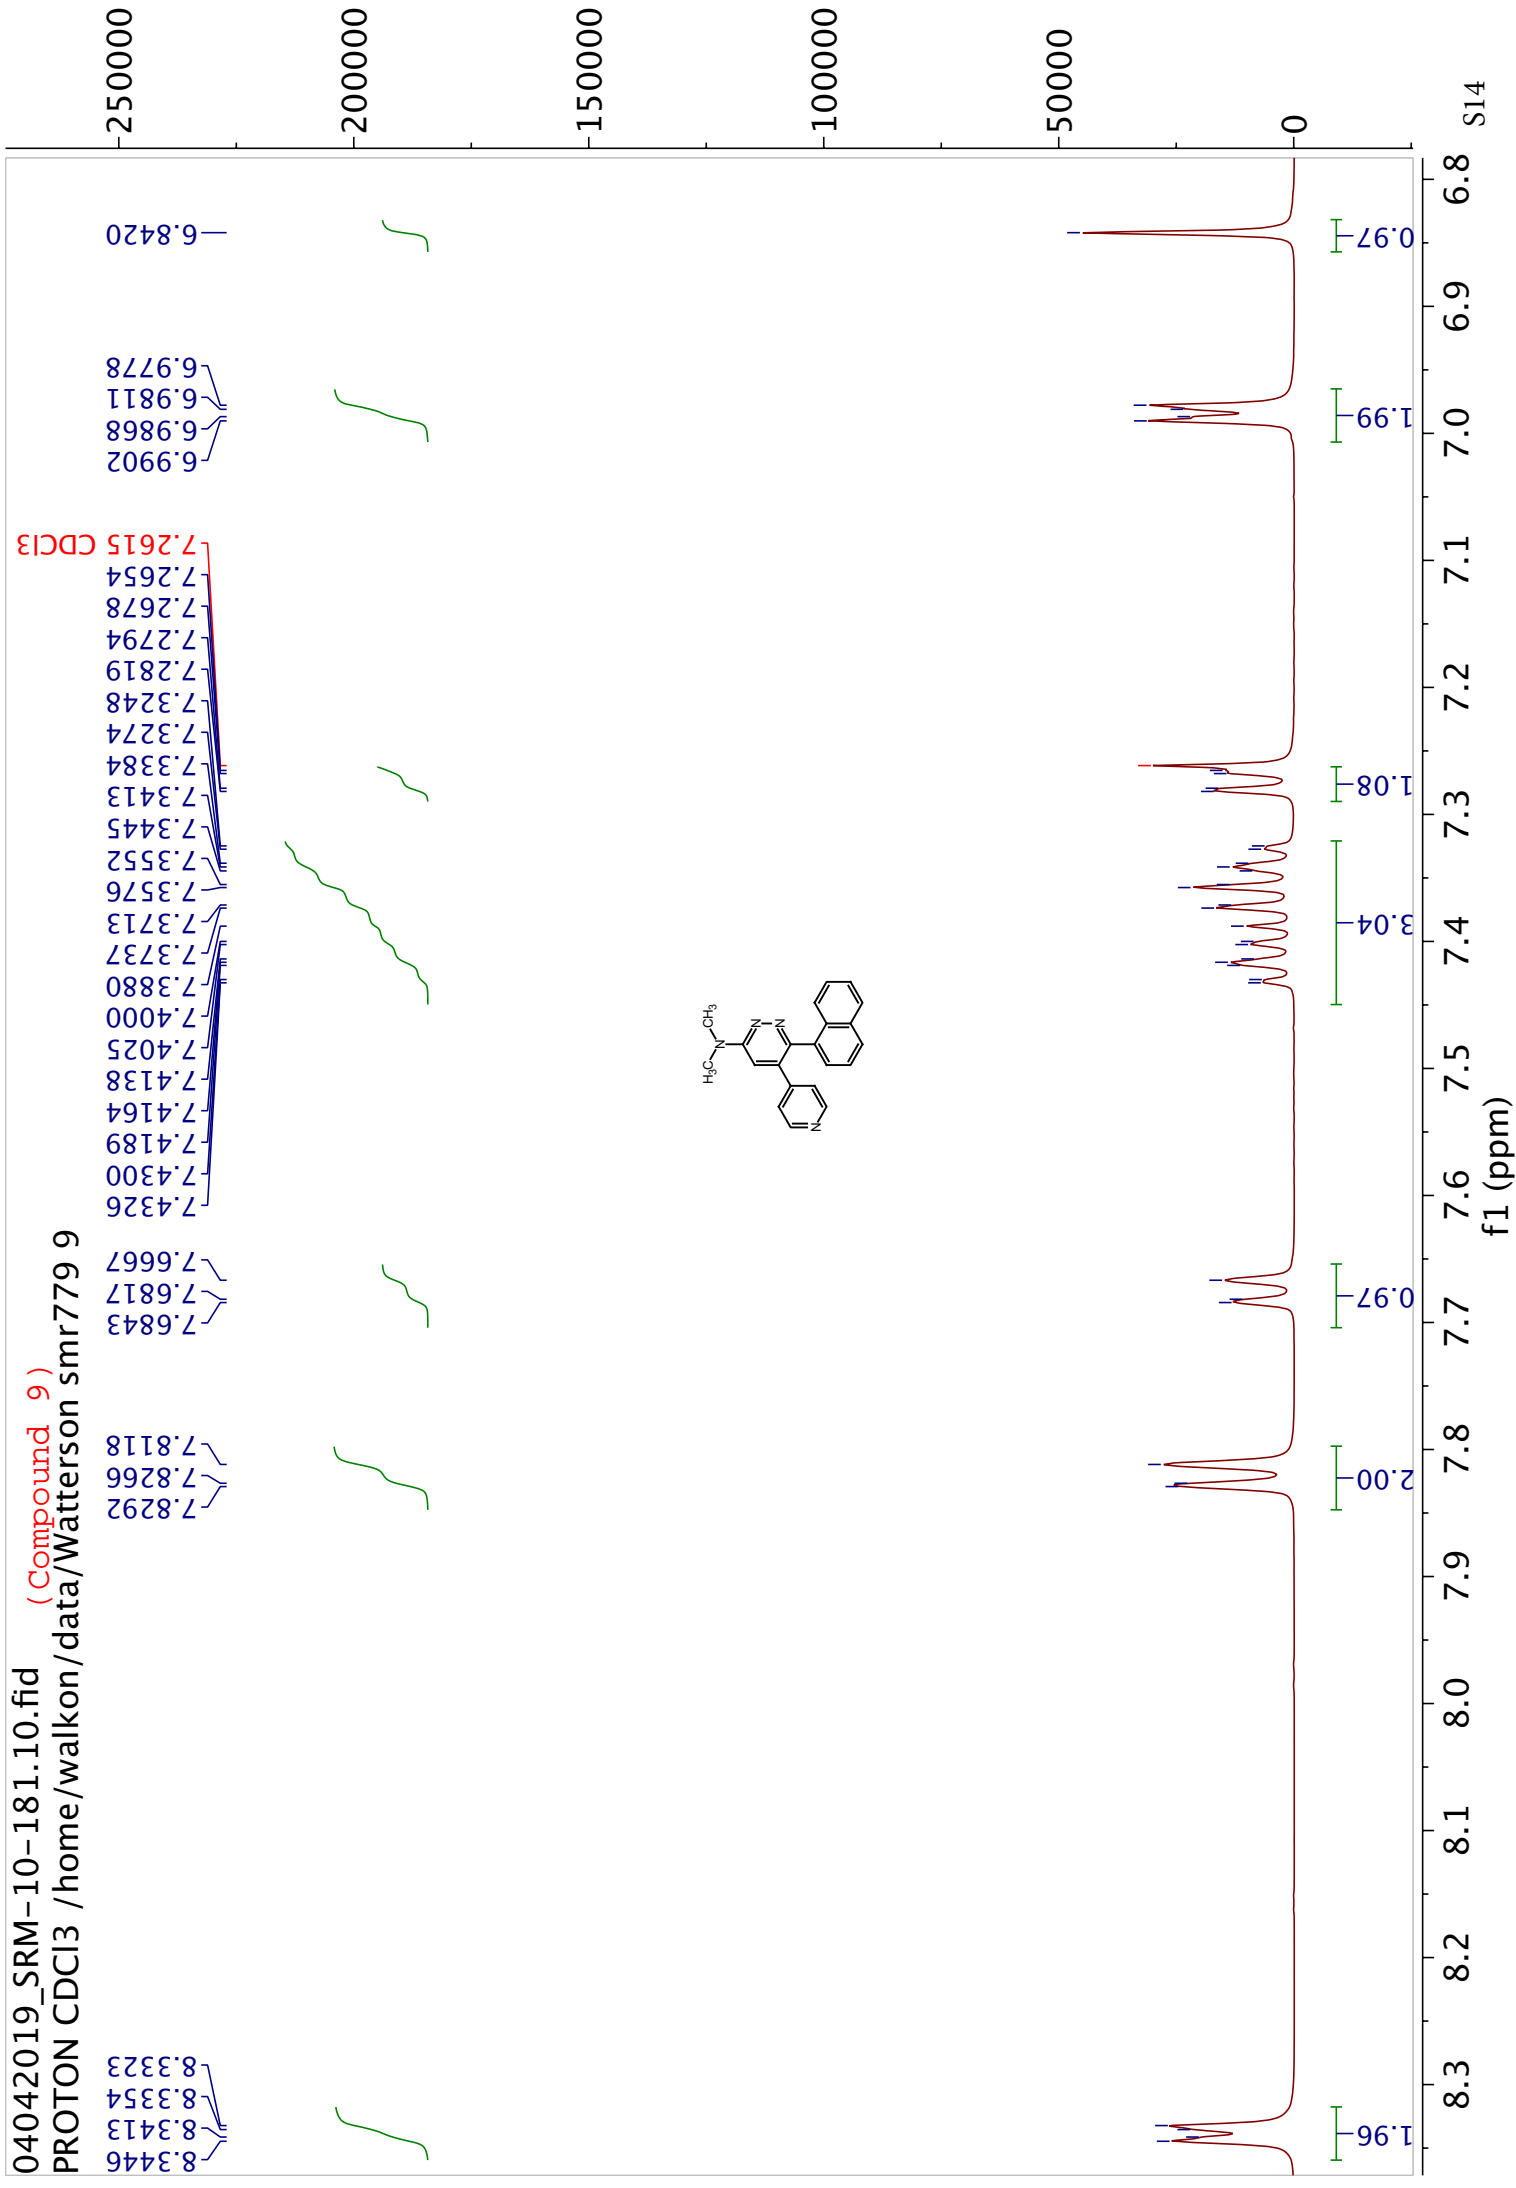

SRM-2-069a.10.fid (Compound 3)  
PROTON CDCI3 /home/walkon/data/Watterson smr779 20

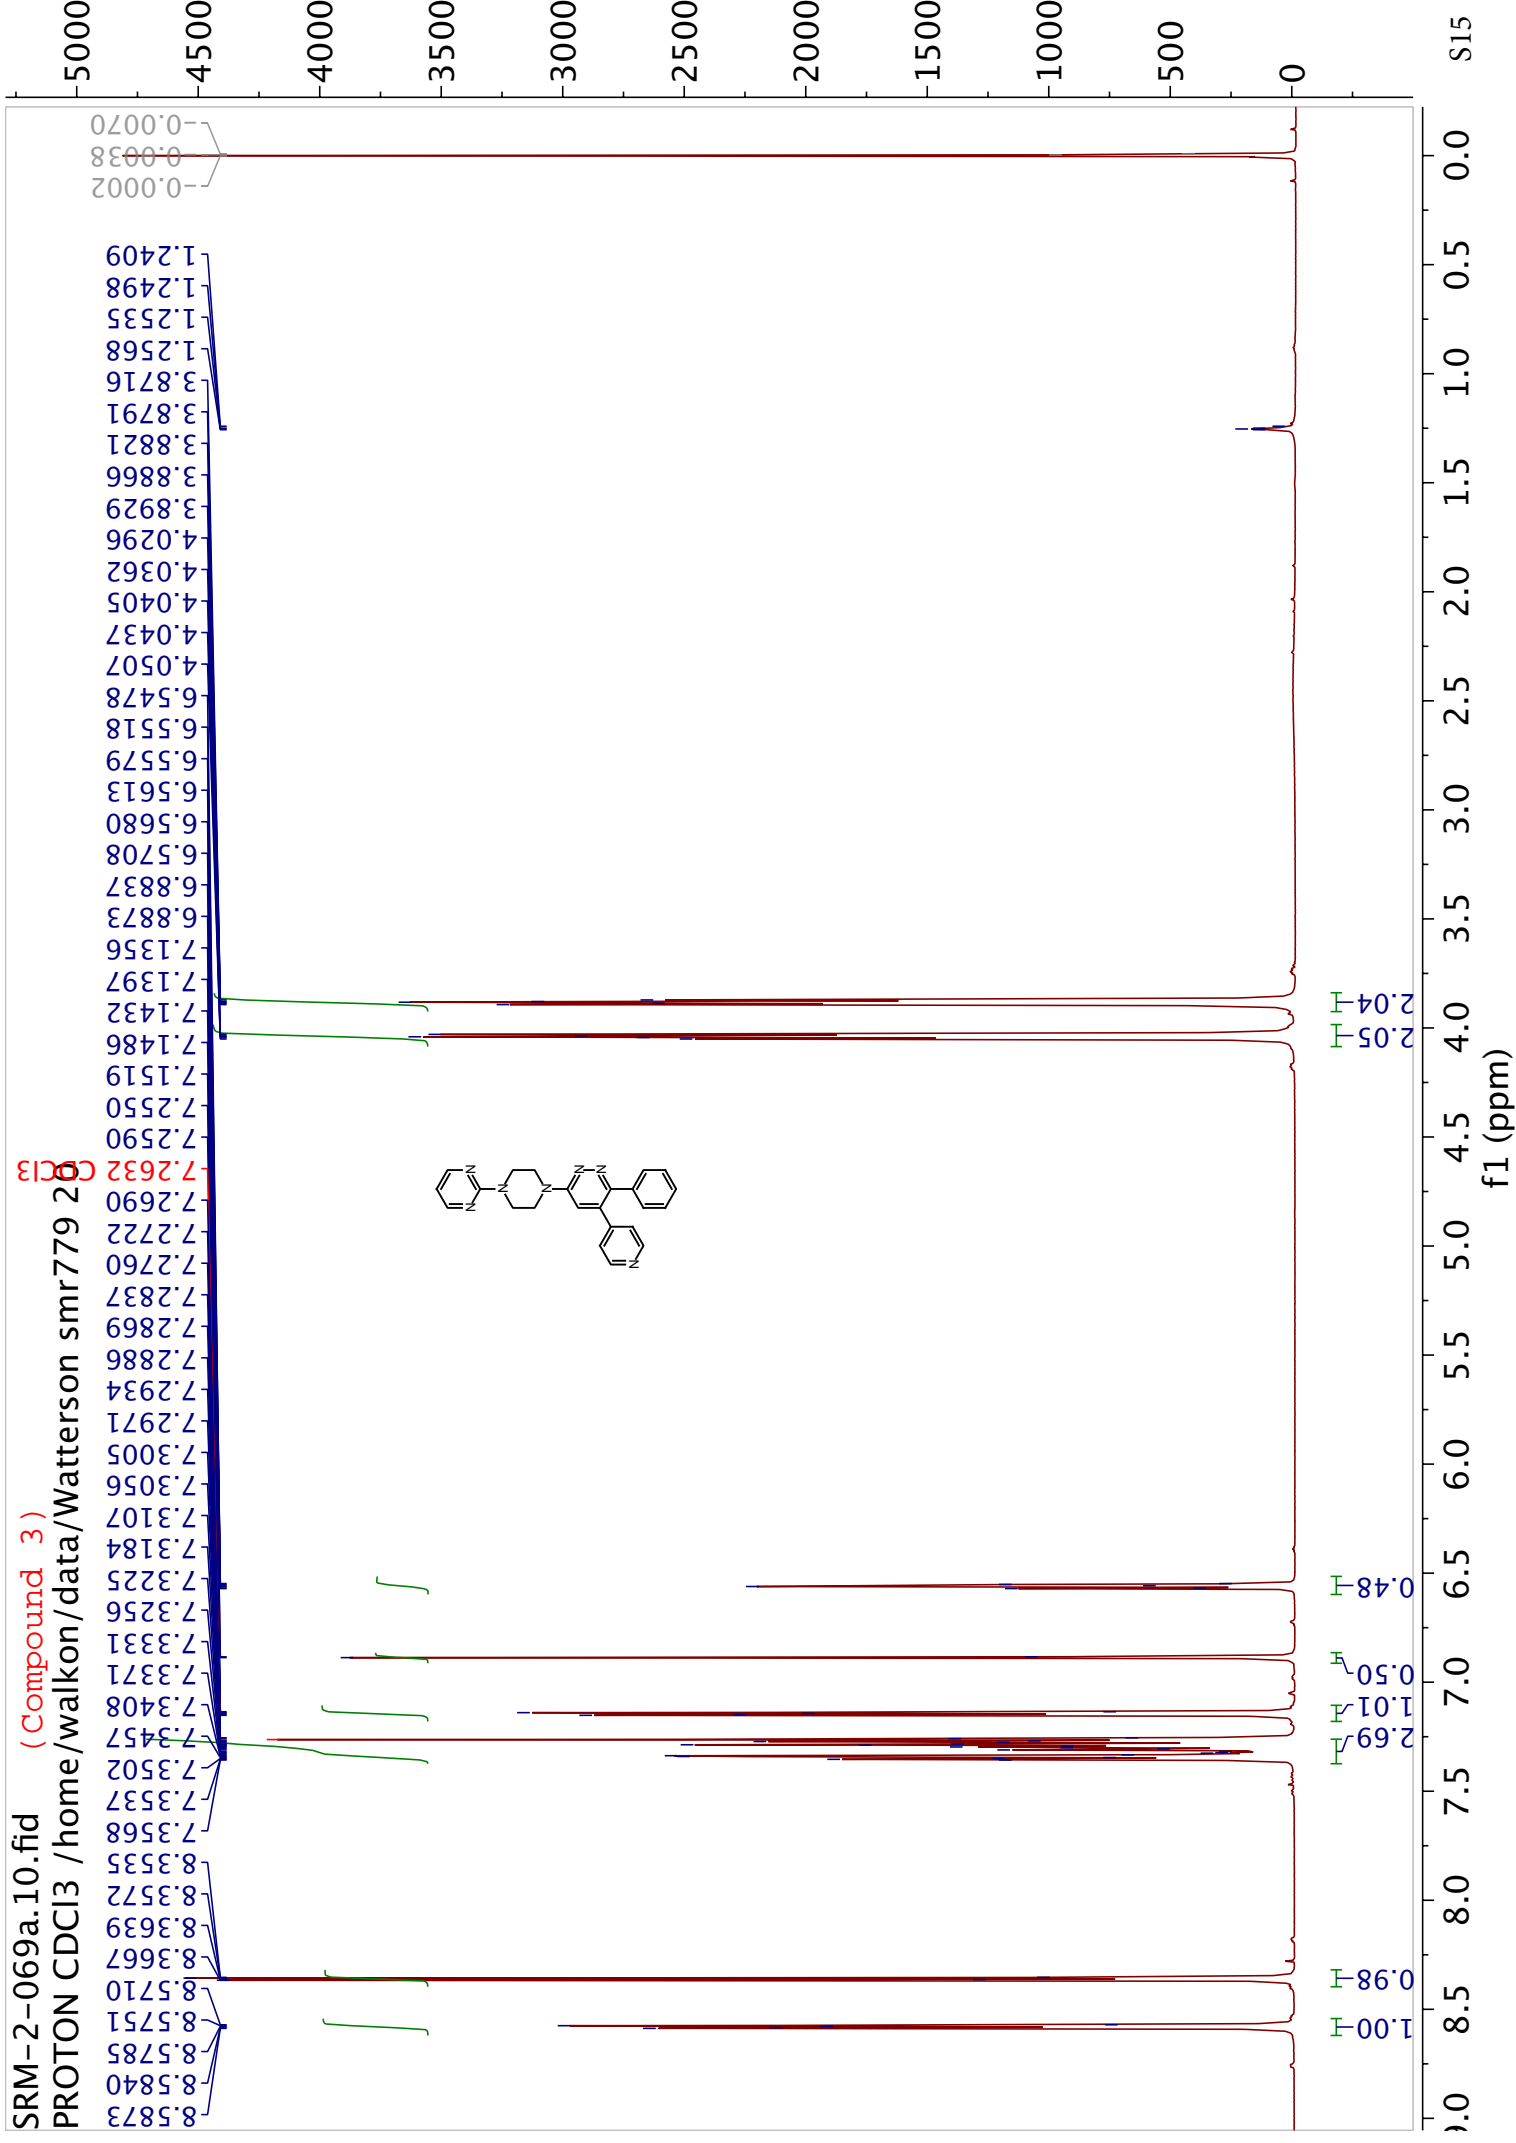

SRM-2-069a.10.fid (Compound 3)  
PROTON CDCl3 /home/walkon/data/Watterson smr779 20

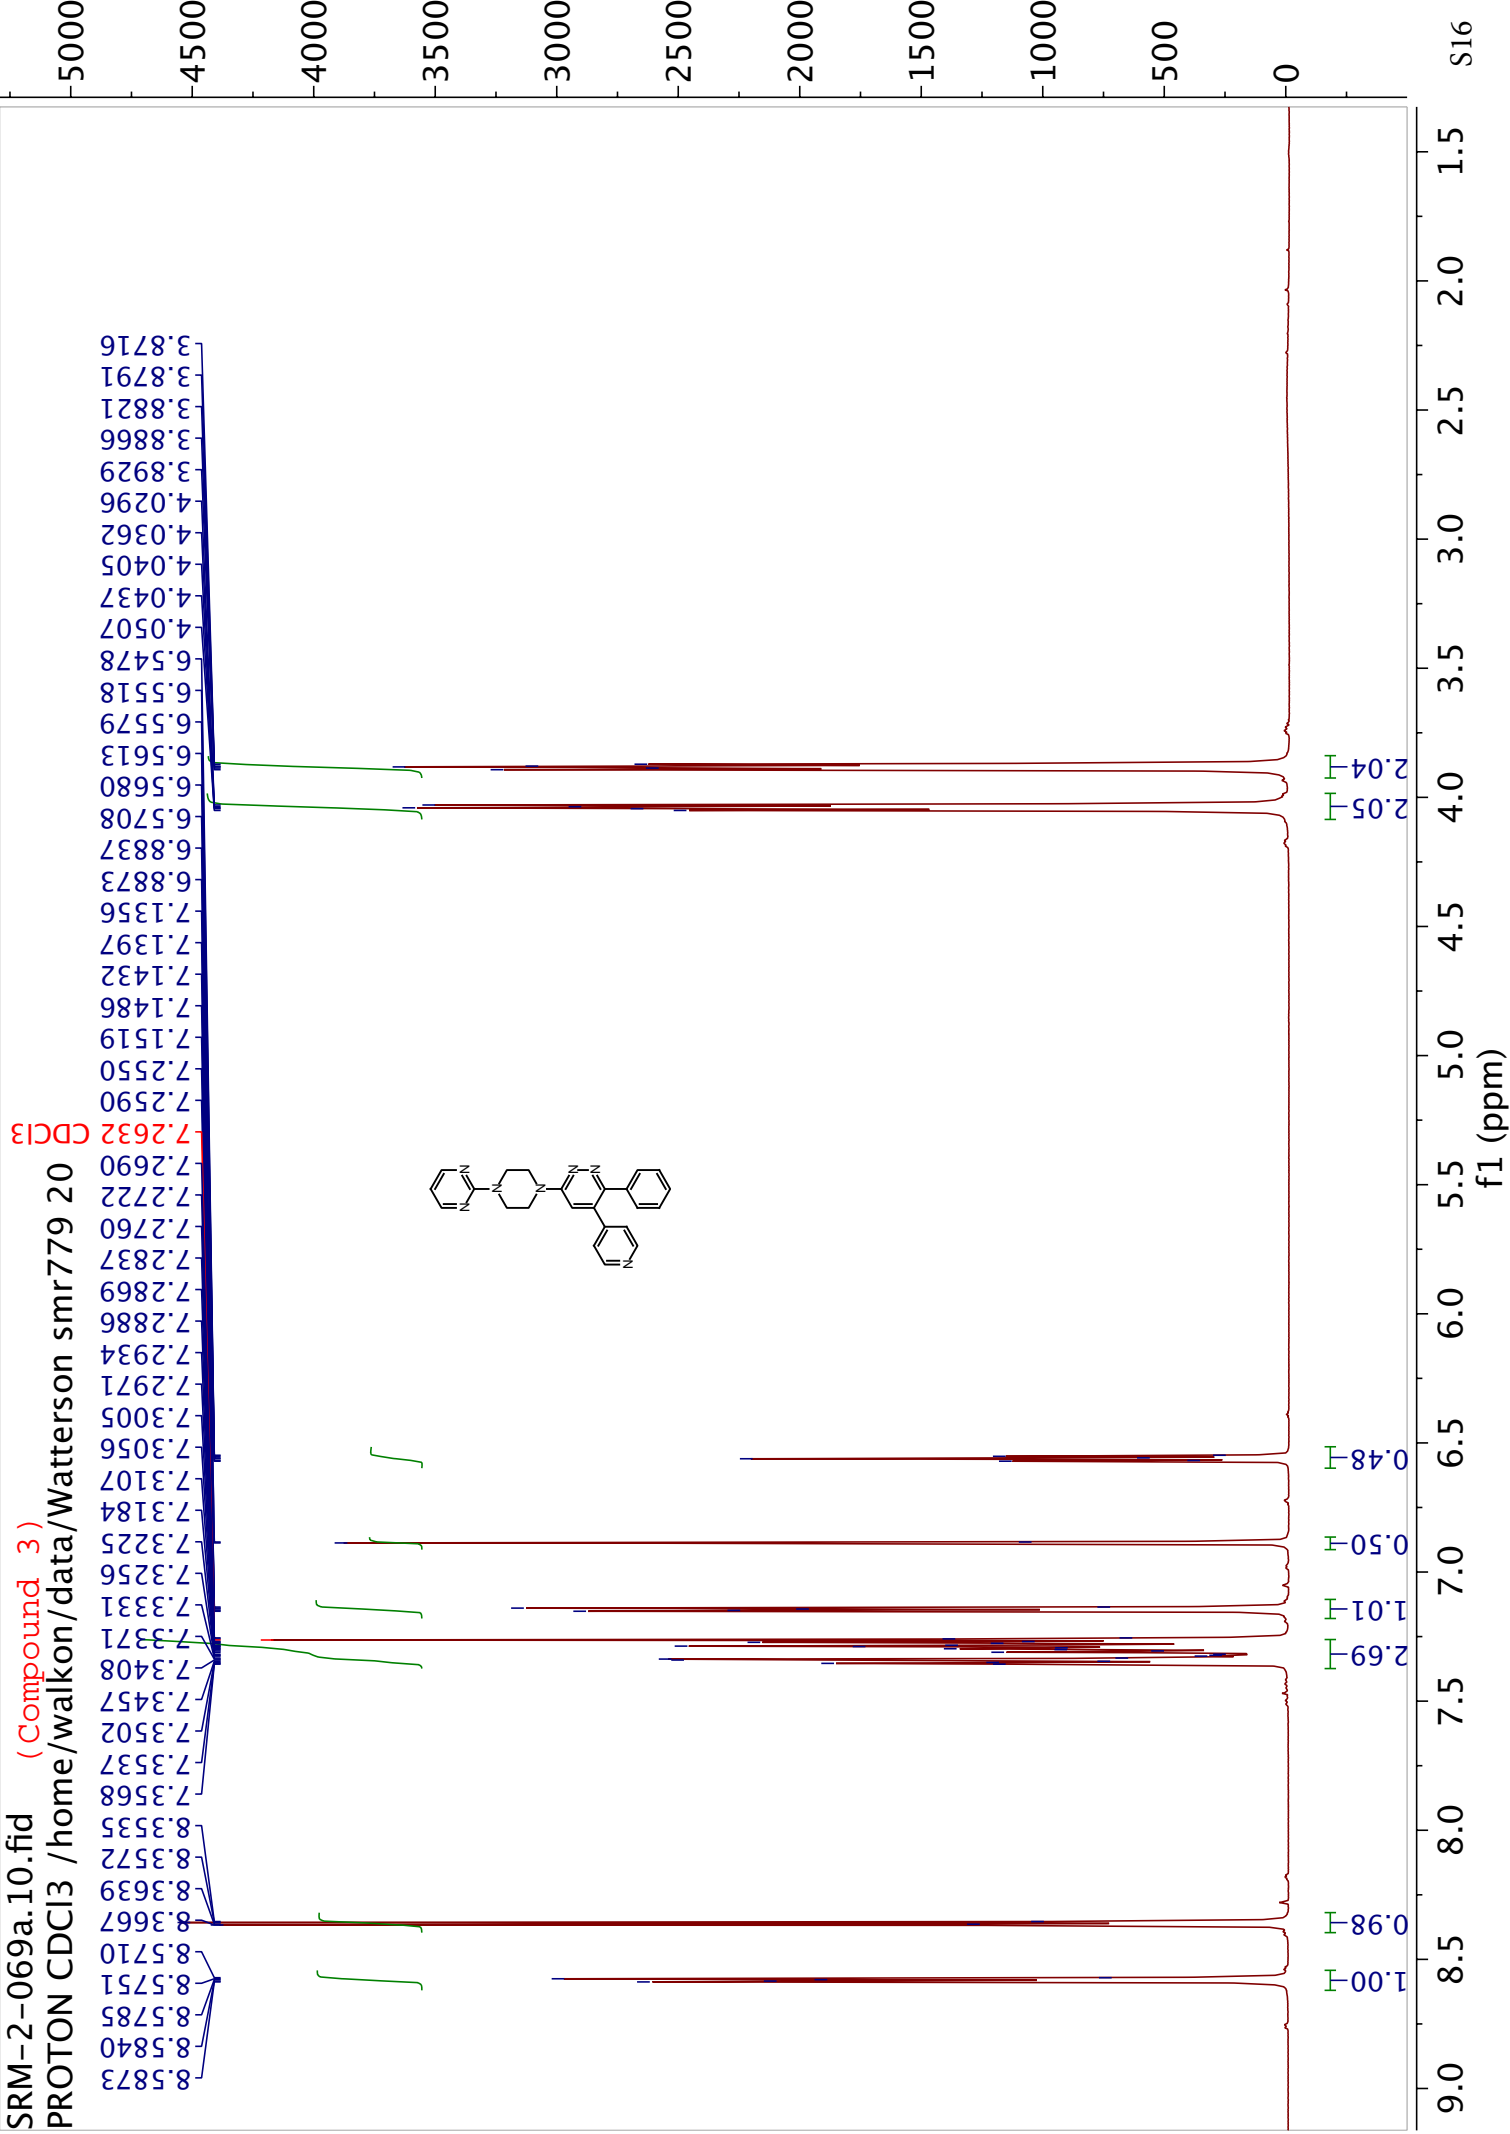



SRM-2-069a.10.fid (Compound 3)  
PROTON CDCI3 /home/waikon/data/Watterson smr779 20

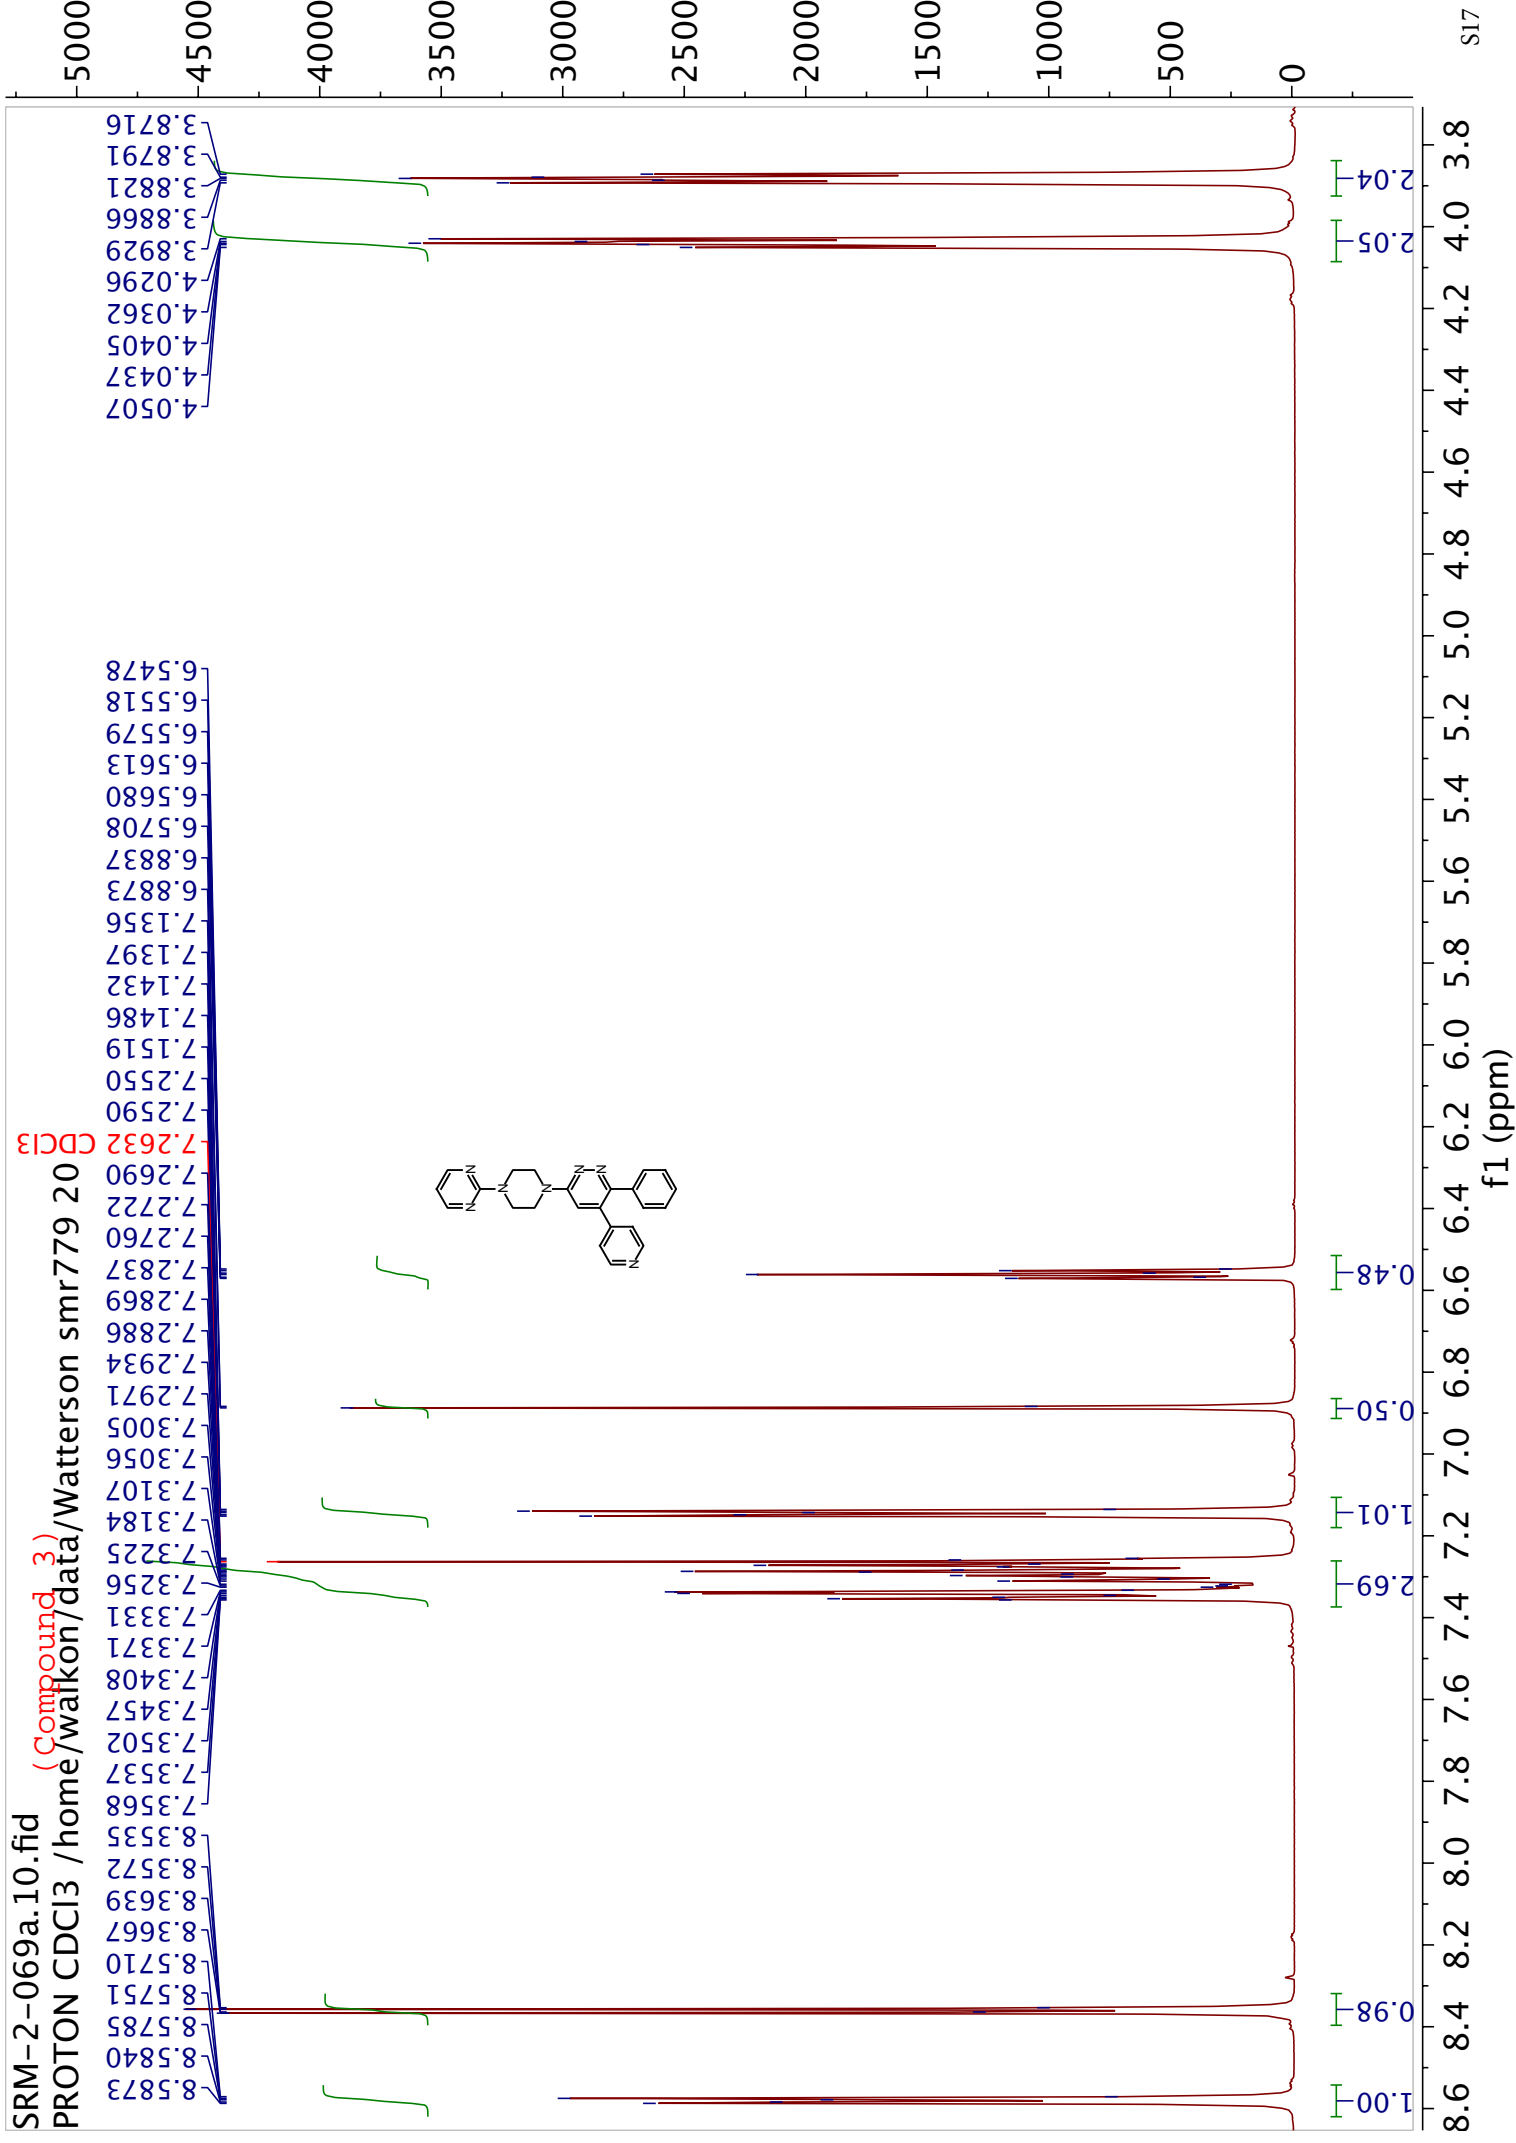

Supplement: jm9b00058_si_001.pdf [file jm9b00058_si_001.pdf]
